1 **Temporal and spatial dynamics in the apple flower microbiome in the presence of**  
2 **the phytopathogen *Erwinia amylovora***

3

4 **Running title:** Flower microbiome dynamics with a phytopathogen

5

6 Zhouqi Cui<sup>1</sup>, Regan B. Huntley<sup>1</sup>, Quan Zeng<sup>1\*</sup>, and Blaire Steven<sup>2\*</sup>

7 <sup>1</sup>Department of Plant Pathology and Ecology, The Connecticut Agricultural Experiment  
8 Station, New Haven, Connecticut, 06504 USA;

9 <sup>2</sup>Department of Environmental Sciences, The Connecticut Agricultural Experiment  
10 Station, New Haven, Connecticut, 06504 USA

11

12

13

14

15 \* Corresponding author: Blaire Steven. Email: [blaire.steven@ct.gov](mailto:blaire.steven@ct.gov); Quan Zeng. Email:

16 [quan.zeng@ct.gov](mailto:quan.zeng@ct.gov)

17 **Abstract:**

18 Plant microbiomes have important roles in plant health and productivity. However,  
19 despite flowers being directly linked to reproductive outcomes, little is known about the  
20 microbiomes of flowers and their potential interaction with pathogen infection. Here, we  
21 investigated the temporal dynamics and spatial traits of the apple stigma microbiome  
22 when challenged with a phytopathogen *Erwinia amylovora*, the causal agent of fire blight  
23 disease. We profiled the microbiome from the stigmas of a single flower, greatly  
24 increasing the resolution at which we can characterize shifts in the composition of the  
25 microbiome. Individual flowers harbored unique microbiomes at the OTU level.  
26 However, taxonomic analysis of community succession showed a population gradually  
27 dominated by bacteria within the families *Enterobacteriaceae* and *Pseudomonadaceae*.  
28 Flowers inoculated *E. amylovora* established large populations of the phytopathogen,  
29 with pathogen specific gene counts of  $>3.0 \times 10^7$  in 90% of the flowers. Yet, only 42% of  
30 inoculated flowers later developed fire blight symptoms. This reveals pathogen amount  
31 on the stigma is not sufficient to predict disease outcome. Our data demonstrate that  
32 apple flowers represent an excellent model in which to characterize how plant  
33 microbiomes establish, develop, and interact with biological processes such as disease  
34 progression in an experimentally tractable plant organ.

35

36

37

38

39

## 40 **Introduction**

41           Flowers, the reproductive organs of angiosperms, play a critical role in the plant's  
42 lifecycle. The most important function of flowers is to provide a mechanism for  
43 pollination, the union of sperm contained within pollen, to the ovules contained in the  
44 ovary. The fertilized ovules produce seeds that will later germinate to become the next  
45 generation of plants. Yet, unlike other vegetative organs such as the roots, stems, and  
46 leaves that are present through a large part of the plant's lifecycle, flowers develop on  
47 mature plants and are typically present for the limited period during bloom. As such,  
48 research characterizing the microbiome of the flower is generally less developed than for  
49 other plant organs.

50           Flowers of apple (*Malus domestica*) have been subject to considerable research  
51 attention as they are the direct precursors of apple fruits, one of the most consumed fruits  
52 worldwide (1). The ephemeral nature of apple flowers, with mature flowers from petal  
53 open to petal fall only lasting for 5-10 days in spring, offers a unique environment in  
54 which to study community succession (1, 2). During bloom, petals open up in a relatively  
55 short period of time, typically within one day, which exposes the internal flower parts to  
56 the environment and microorganisms. Several of these internal flower parts exude various  
57 types of nutrient-rich secretions including nectar, stigmatic exudate, and pollen exudate,  
58 for the purpose of attracting pollinators, and inducing the germination of pollen grains (1,  
59 3). These secretions are rich in sugars, amino acids, polysaccharides, and glycoproteins,  
60 which are excellent sources of nutrients for many microorganisms (1, 3, 4). The stigma is  
61 particularly nutrient rich and harbors a larger microbial biomass than other flower parts  
62 (5, 6). Previous research has documented a relatively low diversity of the stigma

63 microbiome, although certain lineages predominantly within the families  
64 *Enterobacteriaceae* and *Pseudomonadaceae* tend to be dominant (7).

65 While the stigma provides an excellent niche for microbial colonization, it also  
66 offers an opportunity for pathogen infection. Many pathogens have evolved to take  
67 advantage of this environmental niche, among which one of the most important is the  
68 phytopathogenic bacterium *Erwinia amylovora*, the causal agent of fire blight. Fire blight  
69 is considered as one of the most devastating diseases of apple, with annual losses and  
70 costs of control estimated at over \$100 million in the U.S. (8). During bloom, *E.*  
71 *amylovora* (*Ea*) cells are spread to apple flowers by insects, wind, or rain and multiply on  
72 the stigma surface (9). *Ea* cells can then migrate from the stigma to the hypanthium and  
73 enter into the host through the natural opening, the nectarthodes. Initial infection occurs  
74 at the ovary tissue and can spread to other parts of the plants through the plant  
75 vasculature system. Fire blight infection can result in significant yield reduction and / or  
76 tree death. In this regard, uncovering environmental or biologic factors that can inhibit  
77 the spread or development of fire blight are of considerable research interest.

78 One potential source of fire blight control is the natural microbiome of the stigma.  
79 Yet, there exist considerable knowledge gaps concerning how the stigma microbiome is  
80 established and structured. The studies that have considered the stigma microbiome have  
81 generally focused on cataloging microbial diversity through various culture-dependent  
82 and culture-independent methods (7, 10) and few studies have investigated the temporal  
83 development of the microbiome (2). Furthermore, previous research has predominantly  
84 studied the microbiome using pooled flower samples, thus it is uncertain the extent to  
85 which the microbiome differs among individual flowers of the same genetic background.

86 Finally, how the colonization of a phytopathogen affects the development, composition,  
87 or structure of the stigma microbiome is essentially unknown. In this study, we examined  
88 the temporal development of the stigma microbiome in the presence and absence of *Ea* to  
89 investigate how this organism influences the development of the normal microflora of the  
90 apple flower stigma. Additionally, we characterized the variability of the microbiome  
91 amongst 100 individual stigmas inoculated with *Ea* to assess if certain microbiome  
92 members could regulate *Ea* colonization and growth on apple stigmas.

93

## 94 **Materials and methods**

### 95 *Sampling site*

96 To limit the effects of host and environmental conditions, we used flowers from  
97 nine trees of the same apple cultivar ‘Early Macoun’ (*Malus domestica* NY75414-1)  
98 planted at the same geographical location (Lockwood Farm, Hamden, Connecticut,  
99 41.406 N 72.906 W). All trees were the same age and under the same maintenance  
100 program. Weather data (temperature and humidity) prior to and during bloom (from April  
101 29<sup>th</sup> to May 28<sup>th</sup> 2018) is summarized in Table S1.

102

### 103 *Experiment design and stigma collection*

#### 104 *Labeling flower clusters*

105 On May 6<sup>th</sup> 2018, 40 flower clusters that were in ‘King bloom’ stage (central  
106 flower opened but the four side flowers still closed, see Fig. 1A) were labeled with plastic  
107 tags. The day after the flower clusters were tagged, we identified clusters in which the

108 side flowers were open and flower clusters with unopened flowers were not used. In this  
109 manner, only side flowers of roughly the same age were used in subsequent experiments.

110

### 111 *Sampling for temporal alterations of the stigma microbiome*

112 On May 7<sup>th</sup> 2018, ten of the 40 tagged flower clusters were selected, and the  
113 stigmas of an individual flower were harvested with sterile scissors (see Fig. 1B) and  
114 placed in a sterile 1.5 ml microcentrifuge tube. Collected stigma samples were kept in  
115 liquid nitrogen and transported to the laboratory for immediate processing. These samples  
116 were labeled as day 1 samples. The next day, another 10 flowers were selected for DNA  
117 extraction as described above (as day 2 samples). Immediately after sample collection on  
118 day 2, *Ea* was inoculated onto 20 tagged flower clusters and labeled as *Ea* treated. The  
119 inoculum consisted of an overnight culture of *E. amylovora* 110 grown in lysogeny broth  
120 (LB) diluted to a final concentration of  $1 \times 10^6$  CFU ml<sup>-1</sup> in sterile water. The diluted  
121 culture was spray-inoculated to the open flowers using a handheld sprayer to ensure  
122 every flower was evenly exposed. Another twenty flower clusters were sprayed with  
123 sterile water as water controls. On each subsequent day (day 3 to day 5), stigmas from 20  
124 *Ea*-treated and 20 water-treated flowers were collected and processed according to the  
125 same method described above.

126

### 127 *Sampling for spatial patterns in the stigma microbiome*

128 To investigate a larger spatial sampling of *Ea* inoculated flowers, we performed a  
129 parallel experiment, and tagged an additional 150 flower clusters to ensure flowers used  
130 in the experiment were the same age as the rest of the experimental set. As described for

131 the temporal sampling, the flower clusters were individually spray-inoculated with *Ea* (1  
132  $\times 10^6$  CFU ml<sup>-1</sup>) on day 2, and stigma samples of individual flowers were harvested on  
133 day 4. A total of 100 flowers of the same developmental stage were harvested for DNA  
134 extraction, while the remaining flowers of each flower cluster were left on the tree to  
135 monitor disease development. Blossom blight symptoms, black withering and dying of  
136 the remaining flowers (Fig. 1C), were evaluated two weeks after inoculation on May 24<sup>th</sup>,  
137 2018. An illustrated scheme of both temporal and spatial sampling is shown in Fig. S1.

138

### 139 *DNA extraction and sequencing of bacterial 16S rRNA genes*

140 For extraction of bacterial DNA, 200  $\mu$ l of 0.5x phosphate-buffered saline (PBS)  
141 was added to each microcentrifuge tube containing stigma samples. Epiphytic microbes  
142 were removed from the stigma by a 5-minute water bath sonication followed by a 30-  
143 second vortex. DNA was extracted from the 200  $\mu$ l of bacterial suspension by using the  
144 DNeasy PowerSoil Kit (Qiagen, Hilden, Germany) according to manufacturer's  
145 instructions. The amount of template DNA added in the PCR reaction (25  $\mu$ l) ranged  
146 from 10.0 ng to 20.0 ng as determined by Nanodrop2000 (Thermo Fisher Scientific,  
147 Waltham, MA). DNA was amplified by using the 515f/806r primer set, which targets the  
148 V4 region of the bacterial 16S rRNA gene, with both primers containing a 6-bp barcode  
149 unique to each sample (11). PNA clamps were added to the PCR mixture at a  
150 concentration of 0.75  $\mu$ M to block the PCR amplification of apple plastid and  
151 mitochondrial sequences (7). PCR conditions were performed as described in Steven et  
152 al. (2018) (7). Successful PCR amplifications at the correct amplicon size were confirmed  
153 by gel electrophoresis. The PCR products were purified and normalized by using

154 SequelPrep normalization plate kit (Invitrogen, CA, USA). Pyrosequencing was  
155 conducted on an Illumina MiSeq v2.2.0 platform through services provided by the  
156 UConn MARS facility.

157

#### 158 *Quantitative PCR for enumeration of E. amylovora*

159 The abundance of *Ea* in each collected stigma sample was quantified by  
160 determining the cycle threshold (CT) value of the *Ea* specific gene *amsC* (12).  
161 Quantitative PCR (qPCR) was performed using a SsoAdvanced universal SYBR Green  
162 supermix (Bio-Rad, CA, USA), as described previously (13). The CT values for a 1/10  
163 dilution series of known *amsC* gene copies of *E. amylovora* chromosomal DNA was  
164 determined to make a standard curve for calculation of copy numbers in stigma samples.

165

#### 166 *Bioinformatics and statistical analysis.*

167 Illumina sequencing reads were assembled into contigs and quality screened by  
168 using mothur v1.39.5 as previously described (14). Sequences that were at least 253 bp in  
169 length, contained no ambiguous bases, and no homopolymers of more than 8 bp were  
170 used in the analysis. Chimeric sequences were identified by using the VSEARCH as  
171 implemented in mothur (15), and all potentially chimeric sequences were removed. To  
172 maintain a similar sampling effort between samples, samples with less than 10,000  
173 sequences per sample were also removed. The resulting sequence counts per sample are  
174 presented in Table S2. Negative control (PCR using sterile H<sub>2</sub>O as a template) was also  
175 included in both sequence datasets. The sequences data are deposited in the Sequence  
176 Read Archive under accession number PRJNA597302.



177           Sampling effort was normalized to the depth of the smallest sample and  
178 operational taxonomic units (OTUs) were defined at 100% sequence identity, employing  
179 the OptiClust algorithm in mothur (16). Taxonomic classification of sequences was  
180 performed with the Ribosomal Database Project (RDP) classifier against the SILVA v132  
181 reference alignment in mothur (17, 18). Non-metric multidimensional scaling (NMDS)  
182 was used to visualize the pairwise distances among samples with Bray-Curtis distances in  
183 the Vegan package in R (19). Descriptive diversity statistics were calculated in mothur.  
184 The correlation between alpha diversity determined with the non-parametric Shannon's  
185 Diversity Index and *E. amylovora* abundance in each sample was generated with the  
186 ggplot2.0 package for R (20). Statistically significant differences in diversity statistics  
187 were identified with a one-way ANOVA and Tukey-Kramer post hoc test in the agricolae  
188 package in R.

189

## 190 **Results**

### 191 *Temporal patterns in stigma microbial community assembly*

192           We characterized the microbial community on stigmas collected from individual  
193 flowers, over a period of 5 days after petal opening, to investigate the temporal dynamics  
194 in community assembly and microbial succession on the stigma. Meanwhile, we included  
195 *Ea* inoculated stigmas to compare community succession in the presence of a  
196 phytopathogen. A total of 2 930 231 high-quality filtered sequences were obtained from  
197 96 samples with the number of sequences ranging from 10 210 to 97 668 (Table S2).  
198 These sequences clustered into 46 809 OTUs (mean 222 per sample) at 100% sequence  
199 similarity.

200 At the phylum level, 24 phyla were detected. In both the water control and *Ea*  
201 inoculated datasets, the dominant phylum was *Proteobacteria* (94.3% of total sequences),  
202 followed by *Cyanobacteria* (3.6%), *Actinobacteria* (0.8%), *Firmicutes* (0.2%) and  
203 *Bacteroidetes* (0.2%). A temporal pattern was observed, in that phyla outside the  
204 *Proteobacteria* were most abundant in the early time points (days 1 and 2) accounting for  
205 15% of sequences and decreasing to <1% at later time points (Fig. S2).

206 Given the dominance of *Proteobacteria*, these sequences were classified to deeper  
207 taxonomic ranks. Sixty-seven families were identified, with the majority belonging to the  
208 *Enterobacteriaceae* (average 70.0%, blue bars) and *Pseudomonadaceae* (26.2%, red bars  
209 in Fig. 2), with small contributions from *Moraxellaceae* (0.6%), *Beijerinckiaceae* (0.2%),  
210 unclassified *Gammaproteobacteria* (0.3%), *Burkholderiaceae* (0.3%) and  
211 *Xanthomonadaceae* (0.2%) (Fig. 2). Of note, both *Pseudomonadaceae* and  
212 *Enterobacteriaceae* gradually accounted for a larger proportion of the microbiome as  
213 time progressed in both water control and *Ea* inoculated datasets (Fig. 2). Yet, the  
214 average proportion of *Enterobacteriaceae* (the family to which *Ea* belongs) was higher in  
215 the *Ea* treated flowers compared to water control (89.7% versus 45.6% at day 5) (Fig. 2).

216

#### 217 *Abundance of Ea on individual flowers*

218 We employed two methods to assess the abundance of *Ea* in the datasets, relative  
219 abundance of *Ea* sequences in the dataset and *Ea* copy numbers quantified by qPCR of an  
220 *Ea* specific gene. First, we identified an OTU in the dataset that had 100% sequence  
221 identity with the inoculated *Ea* strain (OTU1; Table S3). OTU1 was detected every day  
222 but not in all samples. On days 1 and 2, prior to the stigma treatments, OTU1 made up an

223 average of 4% and 6% of the microbiome sequences, respectively (filled bars in Fig. 2).  
224 In the control water sprayed stigmas the proportion of OTU1 gradually increased from an  
225 average of 2% of sequences on day 3 to 13% on day 4, finally making up an average of  
226 24% of sequence on day 5. In contrast, the populations of OTU1 were larger in the *Ea*  
227 treated stigmas. By day 3 OTU1 accounted for an average of 50% of the sequence  
228 libraries, increasing to 86% on day 4 and ending at 94% of sequences on day 5, a 2.9-fold  
229 increase in comparison to the controls (Fig. 2).

230 In addition, qPCR was performed to quantify the genome copies of *Ea* in each  
231 stigma sample. As was observed for OTU1, *Ea* was identified across the dataset. In the  
232 pretreated stigmas (days 1 and 2) the average copy number of *Ea* DNA were  $\sim 7.7 \times 10^6$   
233 (Fig. 2). In the control datasets, the DNA copy number were similar on days 3 and 4 at  
234  $5.7 \times 10^6$  and  $7.4 \times 10^6$ , respectively, and increased to  $1.5 \times 10^7$  on day 5 (Fig. 2). In the  
235 *Ea* inoculated flowers the copy number of *Ea* on day 3 (one day after inoculation) was  
236 similar to the control flowers, suggesting *Ea* had not yet established strong growth on the  
237 stigma (Fig. 2). However, by day 4 the average abundance of *Ea* on the treated stigmas  
238 reached  $3.0 \times 10^7$ , a 300% increase compared to the controls, and increased further on  
239 day 5 reaching an average of  $4.3 \times 10^8$ , a 28-fold increase in comparison to the controls  
240 (Fig. 2). Taken together, these data suggest that *Ea* may be naturally present in the  
241 orchard, as it was commonly detected in the pretreated and control stigmas. Yet, the *Ea*  
242 inoculation clearly benefited *Ea* colonization, which was readily apparent by day 5, three  
243 days after the inoculation.

244

245 *Effects of Ea inoculation on community composition and diversity*

246 To test if *Ea* treatment had a significant effect on microbiome composition, we  
247 visualized the Bray-Curtis distances among samples of each dataset using NMDS. The  
248 samples clearly clustered due to *Ea* inoculation, which was confirmed by permutational  
249 multivariate ANOVA ( $P = 0.001$ ) (Fig. 3A). Additionally, samples were also clustered  
250 based on days post-bloom ( $P = 0.001$ ) (Fig. 3A). Diversity of the stigma communities  
251 was assessed by calculating the Shannon's Diversity index. For both control and *Ea*  
252 inoculated datasets there was a trend towards increased diversity in the early time points,  
253 which then decreased by days 4 and 5 (Fig. 3B). When the control and *Ea* inoculated  
254 datasets were combined to test the overall effect of pathogen presence on microbial  
255 diversity, there was no significant difference in diversity due to *Ea* treatment ( $p=0.109$ ;  
256 Fig. 3B).

257 Collectively, these findings indicate that taxonomically diverse microbial  
258 populations initially colonize the stigma of the apple flower. Gradually, a community  
259 dominated by representatives of the *Pseudomonadaceae* and *Enterobacteriaceae* families  
260 outcompetes these populations and become the predominant community members (Fig.  
261 2), which results in an overall decrease in diversity of the stigma microbial community  
262 (Fig. 3B & C). In the face of *Ea* challenge there is a significant shift in the composition of  
263 the microbial community (Fig. 3A). Yet, there is no significant effect on the diversity of  
264 the community as a whole in comparison to the control flowers (Fig. 3B).

265

#### 266 *The influence of Ea inoculation on 100 spatially separated flower clusters*

267 The data for the temporal dynamics were based on a limited number of samples.  
268 To further explore the interaction of microbes when colonized by a phytopathogen, we

269 expanded the analysis to 100 spatially separated flower clusters (approximately 400  
270 individual flowers) inoculated with *Ea*. Flowers were collected from the clusters for  
271 microbiome characterization, while the remainder of the flowers were left on the tree to  
272 monitor the rate of disease development. Three weeks after *Ea* inoculation, only 42.4% of  
273 the flowers developed fire blight symptoms. Given that the genetic background of the  
274 host, flower age, and pathogen exposure were all identical between the inoculated  
275 flowers, and the trials were all performed in the same orchard and thus under the same  
276 environmental conditions, these observations suggest that none of these factors are  
277 sufficient to explain or predict disease occurrence at the single flower level.

278

#### 279 *Genome copies of Erwinia amylovora*

280 We measured the *amsC* copy number from 100 individual flowers by qPCR. The  
281 copy number varied from  $1.3 \times 10^4$  to  $3.7 \times 10^{10}$ . The average was  $4.4 \times 10^9$  (dashed line,  
282 Fig. 4A) and the majority (90%) of stigmas harbored  $> 3.0 \times 10^7$  gene copies of *Ea*,  
283 which is similar to the average of day 4 inoculated flowers in the temporal dynamics  
284 study. These results indicate most of the stigmas harbored large populations of *Ea*,  
285 despite only a proportion of flowers later developing fire blight symptoms.

286

#### 287 *Microbiome composition*

288 A total of 4 176 840 high-quality 16S rRNA gene sequences were recovered from  
289 the 100 flowers, with the number of sequences ranging from 19 297 to 80 130 per  
290 sample. After normalizing sampling to the smallest dataset, clustering produced 27 843

291 OTUs (mean 282 per sample) at 100% sequence similarity. The detailed information for  
292 each dataset is presented in Table S2.

293 At the phylum level, 22 phyla were identified among the sequences. The most  
294 abundant, *Proteobacteria*, ranged from 96.8% to 100% of recovered sequences, followed  
295 by *Actinobacteria* (0-0.5%), *Cyanobacteria* (0-1.6%) and *Firmicutes* (0-1.5%) (Fig. S3).  
296 Within the *Proteobacteria*, 59 families were identified and *Pseudomonadaceae* (red bar  
297 in Fig. 4B) and *Enterobacteriaceae* (blue bar) were predominant (> 81.5% in each  
298 sample). Notably, the proportion of *Pseudomonadaceae* and *Enterobacteriaceae*  
299 significantly varied among the 100 samples, from 0.02% to 99.20% and from 0.45% to  
300 99.97%, respectively (Fig. 4B).

301

302 *OTUs within the Pseudomonadaceae and Enterobacteriaceae*

303 Sequences within *Pseudomonadaceae* and *Enterobacteriaceae* were classified to  
304 deeper taxonomic ranks to investigate if particular OTUs were associated with *Ea*  
305 abundance. Of the 10 most abundant OTUs in the dataset, four belonged to the  
306 *Pseudomonadaceae* and six to the *Enterobacteriaceae*, representing five different genera  
307 (Table S3). By in large each flower harbored a unique microbiome composition, with  
308 widely varying abundance of the predominant OTUs among the samples (Fig. 4C &D).  
309 Furthermore, there was no observable pattern in specific OTUs being co-abundant in the  
310 samples with a high relative abundance of *Pseudomonadaceae* (Fig. 4B &C). For  
311 example, when we tested the correlation between the relative abundance of the most  
312 abundant *Pseudomonadaceae*-related OTU (OTU5; Table S3) and the relative abundance  
313 of *Pseudomonadaceae* in the dataset, the result showed no relationship ( $R^2 = 0.26$ , Fig.

314 S4). In other words, it was not a specific OTU that accounted for the high prevalence of  
315 the family *Pseudomonadaceae*. In contrast, OTU1 (100% sequence identity to *E.*  
316 *amylovora*; Table S3) tended to be highly abundant in samples with elevated counts of *Ea*  
317 (Fig. 4A &D). However, in those samples with low *Ea* counts a particular  
318 *Enterobacteriaceae* OTU was not predominant, suggesting that a specific OTU was not  
319 outcompeting *Ea* in those samples in which *Ea* was not well established.

320

### 321 *Correlates of Ea abundance to metrics of the stigma microbiome*

322 To test if there were any aspects in the community data that were predictive of *Ea*  
323 abundance we performed four correlational analyses. First, the most abundant OTU in  
324 the dataset (OTU1) shared 100% sequence identity with the inoculated *Ea* strain (Table  
325 S3). Therefore, we tested the correlation between the relative abundance of OTU1 and  
326 the *amsC* gene copy number of *Ea*, and thereby testing if the relative abundance of OTU1  
327 was correlated to *Ea* absolute abundance (Fig. 5A). The result showed there was a  
328 positive relationship between the two metrics, with an  $R^2 = 0.29$ , suggesting a  
329 relationship but low explanatory power. Second, as shown in Fig. 4B, many of the  
330 stigmas maintained a large proportion of *Pseudomonadaceae* populations. We  
331 investigated if there was a predictive relationship between the relative abundance of the  
332 *Pseudomonadaceae* and the copy number of *Ea*. The relationship displayed in a negative  
333 pattern but again had a low predictive value ( $R^2 = 0.26$ , Fig. 5B). Thus, an increasing  
334 proportion of *Pseudomonadaceae* was not associated with a reduction of *Ea* colonization  
335 or abundance. Finally, we tested if *Ea* abundance was correlated to two different metrics  
336 of diversity of the stigma microbiome, Shannon's diversity index and the number of

337 recovered OTUs. In both cases there was no relationship between *Ea* abundance and  
338 diversity (Fig. 5C &D). Thus, there was no apparent effect of *Ea* abundance on the  
339 overall diversity of the stigma microbial communities.

340

## 341 **Discussion**

342       The apple flower microbiome has been previously recognized as an important  
343 factor for plant health and as a potential source of biocontrol agents against plant  
344 pathogens (1, 10, 21). Additionally, since the stigma is the major site of pollination and  
345 supports the growth of a large microbial population, microbial growth on the stigma may  
346 also influence pollination (22, 23). Thus, the stigma of a flower is a particularly important  
347 plant tissue for studying the microflora that associate with plants. Yet, information  
348 concerning the establishment, composition, and development of the microbiome on  
349 flower stigmas, as well as the disturbance by the colonization of a phytopathogen, are  
350 largely lacking. Previous studies have generally described the flower microbiome from  
351 whole flowers or nectar (1, 2, 24). In this study, we present data based on collecting the  
352 stigmas from a single flower, increasing both the temporal and spatial resolution at which  
353 the microbiome can be characterized.

354       Temporal dynamics are important for understanding the evolution of microbial  
355 communities (25-27). Shade et al. (2013) characterized the development of the  
356 microbiome on pools of apple flowers under a management program of treating the  
357 flowers with the antibiotic streptomycin to control fire blight. They found bacteria in the  
358 phyla TM7 and *Deinococcus* were predominant and showed signals of ecological  
359 successions with flower age (2). In our study, bacteria within the families



360 *Pseudomonadaceae* and *Enterobacteriaceae* were numerically dominant (Fig. 2), which  
361 is more congruous with other studies of both the culture-dependent (10) and culture-  
362 independent characterizations (7) of apple flower microbial populations. This discrepancy  
363 is likely due to methodological differences between studies, or PCR biases induced by  
364 different PCR primer and blocking pairs. In either case, both studies identified strong  
365 signals of temporal patterns in how the microbiome is structured with flower age. The  
366 data presented here points to a core microbiome that was gradually established on the  
367 stigma predominantly composed of *Pseudomonadaceae* and/or *Enterobacteriaceae*  
368 within the phylum *Proteobacteria* (Fig. 2). The succession of these families was  
369 associated with a reduction of other bacterial taxa, such as the *Moraxellaceae*,  
370 *Xanthomonadaceae*, and *Burkholderiaceae*, which were only present in the early stages  
371 of bloom (Fig. 2). Concurrently, the later stages of bloom were associated with a lower  
372 diversity, supporting the observation that a small number of taxa had monopolized the  
373 stigma environment as the flower aged (Fig. 2). These observations are consistent with  
374 the stigmas being open to colonization by numerous bacteria in the initial stages of  
375 bloom. As the petals open, multiple bacteria carried by wind, dew or insects are  
376 introduced to the stigma creating a diverse microbial population (9). However, with time  
377 those bacteria best adapted to the stigma environment prevail and flourish. This is  
378 analogous to other observations, that complex microbial communities inoculated into a  
379 simple medium converge on a state similarly composed of bacteria in the families  
380 *Pseudomonadaceae* and *Enterobacteriaceae*, a phenomenon referred to as “emergent  
381 simplicity” (28). Thus, there may be conserved rules that govern the assembly of  
382 microbial communities, with respect to niche adaptation (5, 6), and microbial competition

383 (29). Yet, predicting specific microbiome states of individuals or whether the factors that  
384 govern community assembly are deterministic or stochastic still remain significant  
385 knowledge gaps.

386 Inoculation of the flowers with *Ea* induced a significant shift in the structure of  
387 the microbiome (Fig. 3A). The data indicated that the abundance of *Ea* did not alter  
388 microbiome diversity (Fig. 5C &D), but *Ea* abundance may be negatively correlated with  
389 the presence of other microbes, particularly within the family *Pseudomonadaceae* (Fig.  
390 5B). Most notably 90% of inoculated flowers inhabited large counts of *Ea* ( $> 3.0 \times 10^7$   
391 gene copies) and a high relative abundance of sequences identical to the inoculated  
392 pathogen (Fig. 4A &D), yet less than half of the flowers (42%) later developed fire blight  
393 symptoms. As the stigma sampling for microbiome characterization is necessity  
394 destructive, we cannot definitively link the status of the microbiome to disease  
395 development. However, these data strongly point to the absolute abundance of *Ea* to be a  
396 poor predictive measurement of disease occurrence. Thus, there must be another  
397 bottleneck in fire blight disease development beyond *Ea* growth on the stigma. These  
398 could include microclimate (30), antimicrobial compounds or yeasts in the nectar (10,  
399 24), and host system sensing signals of high bacterial density (31). Yet, the observation  
400 of a high carrier rate of a pathogen with low disease incidence is synonymous with  
401 reports for many human pathogens. For instance, it is well established that 20-40% of the  
402 population are asymptomatic persistent carriers of *Staphylococcus aureus*, with a further  
403 70-90% of people considered transient carriers (32). Yet only a minority of people will  
404 develop diseases such as sepsis, pneumonia, or osteomyelitis caused by *S. auerus*  
405 infection (33, 34). Similar phenomenon are observed for *Cutibacterium acnes* as a

406 contributor to skin acne, which is also a major population in the healthy skin microbiome  
407 (35). In this respect, the dynamics of *Ea* growth and fire blight development appear to  
408 follow similar dynamics of other diseases, with a high carrier rate, but lower disease  
409 incidence.

410

## 411 **Conclusion**

412 In this study we show that the apple flower stigma microbiome shares many  
413 characteristics with other host microbiome systems. In the initial stages of stigma  
414 colonization, the microbiome is temporally dynamic, which eventually settles into an  
415 equilibrium community (Fig. 2). Similar dynamics have been found in mammalian  
416 infants, fish, and soil (36-38). At the OTU level, individual flowers harbor largely unique  
417 microbiomes (Fig. 4C &D), similar to vertebrates and insects (39-41). Despite the  
418 diversity of the stigma microbiome at the OTU level (~200 OTUs per sample), the OTUs  
419 fell into just two predominant families (*Pseudomonadaceae* and *Enterobacteriaceae*) that  
420 differed in abundance between individual flowers (Fig. 2 &4). This mirrors the  
421 observation of the dominance of the *Firmicutes* and *Bacteroidetes* in the human intestinal  
422 tract, the so-called *Firmicutes/Bacteroidetes* ratio, and its potential influence on  
423 characteristics such as obesity (42, 43). Finally, we observe that virtually all flowers  
424 exposed to the phytopathogen *E. amylovora* developed large pathogen loads (Fig. 4), yet  
425 only a fraction (~42%) of the flowers developed disease, reflecting a common  
426 observation that pathogen burden is not always predictive of disease development (31,  
427 44). Thus, we propose that the stigma microbiome is not only an important system to  
428 potentially identify biocontrol agents for impeding the development of fire blight, but

429 represents a model system that can be employed to investigate the rules that govern  
430 microbial community assembly, development, and influence on disease progression and  
431 severity.

432

### 433 **Conflict of Interests**

434 The authors declare no conflict of interest.

435

### 436 **Acknowledgments**

437 We thank Sali Diallo and Zach Seltzer for their technical support. This study was  
438 supported by the USDA-NIFA-Organic Transitions grant 2017-51106-27001,  
439 Northeastern IPM Center partnership grant and USDA-Specialty Crop Block Grant  
440 (SCBG) through the Department of Agriculture, State of Connecticut.

441

442 Supplementary information is available at ISME's website.

443

### 444 **Reference:**

- 445 1. Aleklett K, Hart M, Shade A. The microbial ecology of flowers: an emerging frontier in  
446 phyllosphere research. *Botany*. 2014;92(4):253-66.
- 447 2. Shade A, McManus PS, Handelsman J. Unexpected diversity during community  
448 succession in the apple flower microbiome. *MBio*. 2013;4(2):e00602-12.
- 449 3. Ambika Manirajan B, Ratering S, Rusch V, Schwiertz A, Geissler-Plaum R, Cardinale  
450 M, et al. Bacterial microbiota associated with flower pollen is influenced by pollination type, and

- 451 shows a high degree of diversity and species-specificity. *Environmental microbiology*.  
452 2016;18(12):5161-74.
- 453 4. Tucker CM, Fukami T. Environmental variability counteracts priority effects to facilitate  
454 species coexistence: evidence from nectar microbes. *Proceedings of the Royal Society B:  
455 Biological Sciences*. 2014;281(1778):20132637.
- 456 5. Pusey PL, Rudell DR, Curry EA, Mattheis JP. Characterization of stigma exudates in  
457 aqueous extracts from apple and pear flowers. *HortScience*. 2008;43(5):1471-8.
- 458 6. Stockwell V, McLaughlin R, Henkels M, Loper J, Sugar D, Roberts R. Epiphytic  
459 colonization of pear stigmas and hypanthia by bacteria during primary bloom. *Phytopathology*.  
460 1999;89(12):1162-8.
- 461 7. Steven B, Huntley RB, Zeng Q. The influence of flower anatomy and apple cultivar on  
462 the apple flower phytobiome. *Phytobiomes*. 2018;2(3):171-9.
- 463 8. Norelli JL, Jones AL, Aldwinckle HS. Fire blight management in the twenty-first  
464 century: using new technologies that enhance host resistance in apple. *Plant Disease*.  
465 2003;87(7):756-65.
- 466 9. Thomson S, Wagner A, Gouk S, editors. Rapid epiphytic colonization of apple flowers  
467 and the role of insects and rain. VIII International Workshop on Fire Blight 489; 1998.
- 468 10. Pusey PL, Stockwell VO, Mazzola M. Epiphytic bacteria and yeasts on apple blossoms  
469 and their potential as antagonists of *Erwinia amylovora*. *Phytopathology*. 2009;99(5):571-81.
- 470 11. Sinclair L, Osman OA, Bertilsson S, Eiler A. Microbial community composition and  
471 diversity via 16S rRNA gene amplicons: evaluating the illumina platform. *PloS one*.  
472 2015;10(2):e0116955.
- 473 12. Pirc M, Ravnikar M, Tomlinson J, Dreo T. Improved fireblight diagnostics using  
474 quantitative real-time PCR detection of *Erwinia amylovora* chromosomal DNA. *Plant  
475 Pathology*. 2009;58(5):872-81.

- 476 13. Cui Z, Yuan X, Yang C-H, Huntley RB, Sun W, Wang J, et al. Development of a method  
477 to monitor gene expression in single bacterial cells during the interaction with plants and use to  
478 study the expression of the type III secretion system in single cells of *Dickeya dadantii* in potato.  
479 *Frontiers in microbiology*. 2018;9:1429.
- 480 14. Schloss PD, Westcott SL, Ryabin T, Hall JR, Hartmann M, Hollister EB, et al.  
481 Introducing mothur: open-source, platform-independent, community-supported software for  
482 describing and comparing microbial communities. *Appl Environ Microbiol*. 2009;75(23):7537-  
483 41.
- 484 15. Rognes T, Flouri T, Nichols B, Quince C, Mahé F. VSEARCH: a versatile open source  
485 tool for metagenomics. *PeerJ*. 2016;4:e2584.
- 486 16. Westcott SL, Schloss PD. OptiClust, an improved method for assigning amplicon-based  
487 sequence data to operational taxonomic units. *MSphere*. 2017;2(2):e00073-17.
- 488 17. Quast C, Pruesse E, Yilmaz P, Gerken J, Schweer T, Yarza P, et al. The SILVA  
489 ribosomal RNA gene database project: improved data processing and web-based tools. *Nucleic  
490 acids research*. 2012;41(D1):D590-D6.
- 491 18. Wang Q, Garrity GM, Tiedje JM, Cole JR. Naive Bayesian classifier for rapid  
492 assignment of rRNA sequences into the new bacterial taxonomy. *Appl Environ Microbiol*.  
493 2007;73(16):5261-7.
- 494 19. Dixon P. VEGAN, a package of R functions for community ecology. *Journal of  
495 Vegetation Science*. 2003;14(6):927-30.
- 496 20. Wickham H. *ggplot2: elegant graphics for data analysis*: Springer; 2016.
- 497 21. Berendsen RL, Pieterse CM, Bakker PA. The rhizosphere microbiome and plant health.  
498 *Trends in plant science*. 2012;17(8):478-86.
- 499 22. Albrecht M, Padrón B, Bartomeus I, Traveset A. Consequences of plant invasions on  
500 compartmentalization and species' roles in plant–pollinator networks. *Proceedings of the Royal  
501 Society B: Biological Sciences*. 2014;281(1788):20140773.

- 502 23. Edlund AF, Swanson R, Preuss D. Pollen and stigma structure and function: the role of  
503 diversity in pollination. *The Plant Cell*. 2004;16(suppl 1):S84-S97.
- 504 24. Fridman S, Izhaki I, Gerchman Y, Halpern M. Bacterial communities in floral nectar.  
505 *Environmental Microbiology Reports*. 2012;4(1):97-104.
- 506 25. Yuan J, Chaparro JM, Manter DK, Zhang R, Vivanco JM, Shen Q. Roots from distinct  
507 plant developmental stages are capable of rapidly selecting their own microbiome without the  
508 influence of environmental and soil edaphic factors. *Soil Biology and Biochemistry*.  
509 2015;89:206-9.
- 510 26. Marschner P, Neumann G, Kania A, Weiskopf L, Lieberei R. Spatial and temporal  
511 dynamics of the microbial community structure in the rhizosphere of cluster roots of white lupin  
512 (*Lupinus albus* L.). *Plant and Soil*. 2002;246(2):167-74.
- 513 27. Bardgett RD, Bowman WD, Kaufmann R, Schmidt SK. A temporal approach to linking  
514 aboveground and belowground ecology. *Trends in ecology & evolution*. 2005;20(11):634-41.
- 515 28. Goldford JE, Lu N, Bajić D, Estrela S, Tikhonov M, Sanchez-Gorostiaga A, et al.  
516 Emergent simplicity in microbial community assembly. *Science*. 2018;361(6401):469-74.
- 517 29. Pusey P, Stockwell V, Reardon C, Smits T, Duffy B. Antibiosis activity of *Pantoea*  
518 agglomerans biocontrol strain E325 against *Erwinia amylovora* on apple flower stigmas.  
519 *Phytopathology*. 2011;101(10):1234-41.
- 520 30. Herrera CM. Microclimate and individual variation in pollinators: flowering plants are  
521 more than their flowers. *Ecology*. 1995;76(5):1516-24.
- 522 31. Medzhitov R, Schneider DS, Soares MP. Disease tolerance as a defense strategy.  
523 *Science*. 2012;335(6071):936-41.
- 524 32. Hamdan-Partida A, González-García S, de la Rosa García E, Bustos-Martínez J.  
525 Community-acquired methicillin-resistant *Staphylococcus aureus* can persist in the throat.  
526 *International Journal of Medical Microbiology*. 2018;308(4):469-75.

- 527 33. Peacock SJ, de Silva I, Lowy FD. What determines nasal carriage of *Staphylococcus*  
528 *aureus*? *Trends in microbiology*. 2001;9(12):605-10.
- 529 34. Von Eiff C, Becker K, Machka K, Stammer H, Peters G. Nasal carriage as a source of  
530 *Staphylococcus aureus* bacteremia. *New England Journal of Medicine*. 2001;344(1):11-6.
- 531 35. Paetzold B, Willis JR, de Lima JP, Knödlseder N, Brüggemann H, Quist SR, et al. Skin  
532 microbiome modulation induced by probiotic solutions. *Microbiome*. 2019;7(1):95.
- 533 36. Trosvik P, Stenseth NC, Rudi K. Convergent temporal dynamics of the human infant gut  
534 microbiota. *The ISME journal*. 2010;4(2):151.
- 535 37. Shenhav L, Furman O, Briscoe L, Thompson M, Silverman JD, Mizrahi I, et al.  
536 Modeling the temporal dynamics of the gut microbial community in adults and infants. *PLOS*  
537 *Computational Biology*. 2019;15(6):e1006960.
- 538 38. Giatsis C, Sipkema D, Smidt H, Verreth J, Verdegem M. The colonization dynamics of  
539 the gut microbiota in tilapia larvae. *PLoS One*. 2014;9(7):e103641.
- 540 39. Booijink CC, El Aïdy S, Rajilić-Stojanović M, Heilig HG, Troost FJ, Smidt H, et al.  
541 High temporal and inter-individual variation detected in the human ileal microbiota.  
542 *Environmental microbiology*. 2010;12(12):3213-27.
- 543 40. Bolnick DI, Snowberg LK, Hirsch PE, Lauber CL, Org E, Parks B, et al. Individual diet  
544 has sex-dependent effects on vertebrate gut microbiota. *Nature communications*. 2014;5:4500.
- 545 41. Colman DR, Toolson EC, Takacs-Vesbach C. Do diet and taxonomy influence insect  
546 gut bacterial communities? *Molecular ecology*. 2012;21(20):5124-37.
- 547 42. Turnbaugh PJ, Ley RE, Mahowald MA, Magrini V, Mardis ER, Gordon JI. An obesity-  
548 associated gut microbiome with increased capacity for energy harvest. *nature*.  
549 2006;444(7122):1027.
- 550 43. Mariat D, Firmesse O, Levenez F, Guimarães V, Sokol H, Doré J, et al. The  
551 Firmicutes/Bacteroidetes ratio of the human microbiota changes with age. *BMC microbiology*.  
552 2009;9(1):123.



553 44. Råberg L, Sim D, Read AF. Disentangling genetic variation for resistance and tolerance  
554 to infectious diseases in animals. *Science*. 2007;318(5851):812-4.

555

## 556 Figure legends

557 **Figure 1.** Illustration of apple flower clusters. **(A)** An apple flower cluster at “king bloom”. This is  
558 when flower clusters of the same age were tagged. **(B)** Once the surrounding flowers opened  
559 (one day after king bloom), stigmas of flowers were sampled and named as “day 1”. Each  
560 sample contains stigmas collected from an individual flower. A close up photo of individual  
561 stigmas is shown in the inset. **(C)** An example showing a flower with fire blight disease and a  
562 healthy flower coexisting in the same flower cluster. (Photo courtesy: Q. Zeng)

563 **Figure 2.** Temporal dynamics in the predominant bacterial families present on stigmas of  
564 individual flowers. Each column represents a single flower. The seven most abundant families  
565 are displayed, and the category “rare” represents the sum of the remaining taxa. The relative  
566 abundance of OTU1, identified as sharing 100% sequence identity with *Erwinia amylovora*, is  
567 indicated by hatched lines. Copy numbers of *E. amylovora amsC* gene in each sample were  
568 determined by qPCR, and are displayed in the bar graphs above the stacked columns. The  
569 average DNA copies are indicated as well as the average relative abundance of OTU1. The  
570 change in *Ea* inoculated compared to water control was labeled in the brackets. Water control:  
571 flower clusters sprayed with sterile H<sub>2</sub>O. *Ea* inoculated: flower clusters sprayed with a bacterial  
572 suspension of *E. amylovora* strain 110. Day 1-day 5 represent the number of days after petals  
573 opened during bloom.

574 **Figure 3.** **(A)** Non-metric Multidimensional Scaling (NMDS) plot displaying relationships of stigma  
575 microbial community composition in samples from water control (green) and *Ea* inoculated  
576 samples (gold). Symbols indicate stigma sample collection day. The distances were determined  
577 using the Bray-Curtis metric and the stress value of the ordination is indicated. Statistically  
578 significant differences in clustering were evaluated via the Adonis permutation test and P-values  
579 are indicated. **(B)** Comparative analysis of community diversity (Shannon index) among stigma  
580 samples. Changes in diversity over time for the water control samples (left panel) and the *Ea*  
581 inoculated samples (middle panel), respectively. The bar above day 1 and day 2 indicates the  
582 pre-treatment samples, which are the same between the panels. Overall diversity of water  
583 control samples versus *Ea* inoculated samples (far right panel). Statistically significant  
584 differences were identified by ANOVA comparisons of means, employing a post-hoc Tukey-  
585 Cramer test for multiple comparisons. Boxes labeled with different letters showed statistically  
586 significant differences (P-value <0.05).

587 **Figure 4.** **(A)** DNA copy numbers of the *Ea* specific gene *amsC* ordered by abundance in 100  
588 flowers. The dashed line represents average copy number across the samples. **(B)** Relative  
589 abundance (%) of the two major bacterial families within *Proteobacteria* in the stigma  
590 microbiome of 100 flowers. Each column represents an individual flower. The columns are  
591 ordered by *amsC* copy number to match Fig. 4A. **(C)** OTUs within the family *Pseudomonadaceae*  
592 and **(D)** *Enterobacteriaceae*. The category “rare” represents the sum of the remaining taxa.

593 **Figure 5.** Correlations of *Ea* abundance as measured by qPCR against metrics of microbiome  
594 composition. **(A)** Relative abundance (%) of OTU1 identified as *Ea* ( $R^2 = 0.29$ ,  $P = 0.28$ ), **(B)**  
595 Relative abundance (%) of sequences within the *Pseudomonadaceae* family ( $R^2 = 0.26$ ,  $P = 0.00$ ),  
596 **(C)** community diversity (Shannon index) ( $R^2 = 0.02$ ,  $P = 0.19$ ), and **(D)** Number of recovered

597 OTUs ( $R^2 = 0.005$ ,  $P = 0.49$ ). The dashed line is best fit from a linear model test. RA: relative  
598 abundance.

599 **Figure S1.** Schematic diagram describing temporal dynamics and spatial distribution sampling.

600 **Figure S2.** Temporal dynamics in the predominant bacterial phyla present on stigmas of  
601 individual flowers. Each column represents a single flower and are ordered by *Ea* abundance as  
602 determined by qPCR to match Fig. 2. The five most abundant phyla are displayed, and the  
603 category “rare” represents the sum of the remaining taxa. Water control: flower clusters  
604 sprayed with sterile H<sub>2</sub>O. *Ea* inoculated: flower clusters sprayed with a bacterial suspension of *E.*  
605 *amylovora* strain 110.

606 **Figure S3.** Relative abundance (%) of the four major bacterial phyla in the stigma microbiome of  
607 100 flowers. Each column is an individual flower and are ordered by *amsC* copy number to  
608 match Fig. 4A. The five most abundant phyla are displayed, and the category “rare” represents  
609 the sum of the remaining taxa.

610 **Figure S4.** Correlational analysis in the relative abundance of OTU5 (most abundant OTU within  
611 the *Pseudomonadaceae*) against the relative abundance of *Pseudomonadaceae* ( $R^2 = 0.26$ ,  $P =$   
612 0.00). The dashed line is best fit from a linear model test.

613

**A**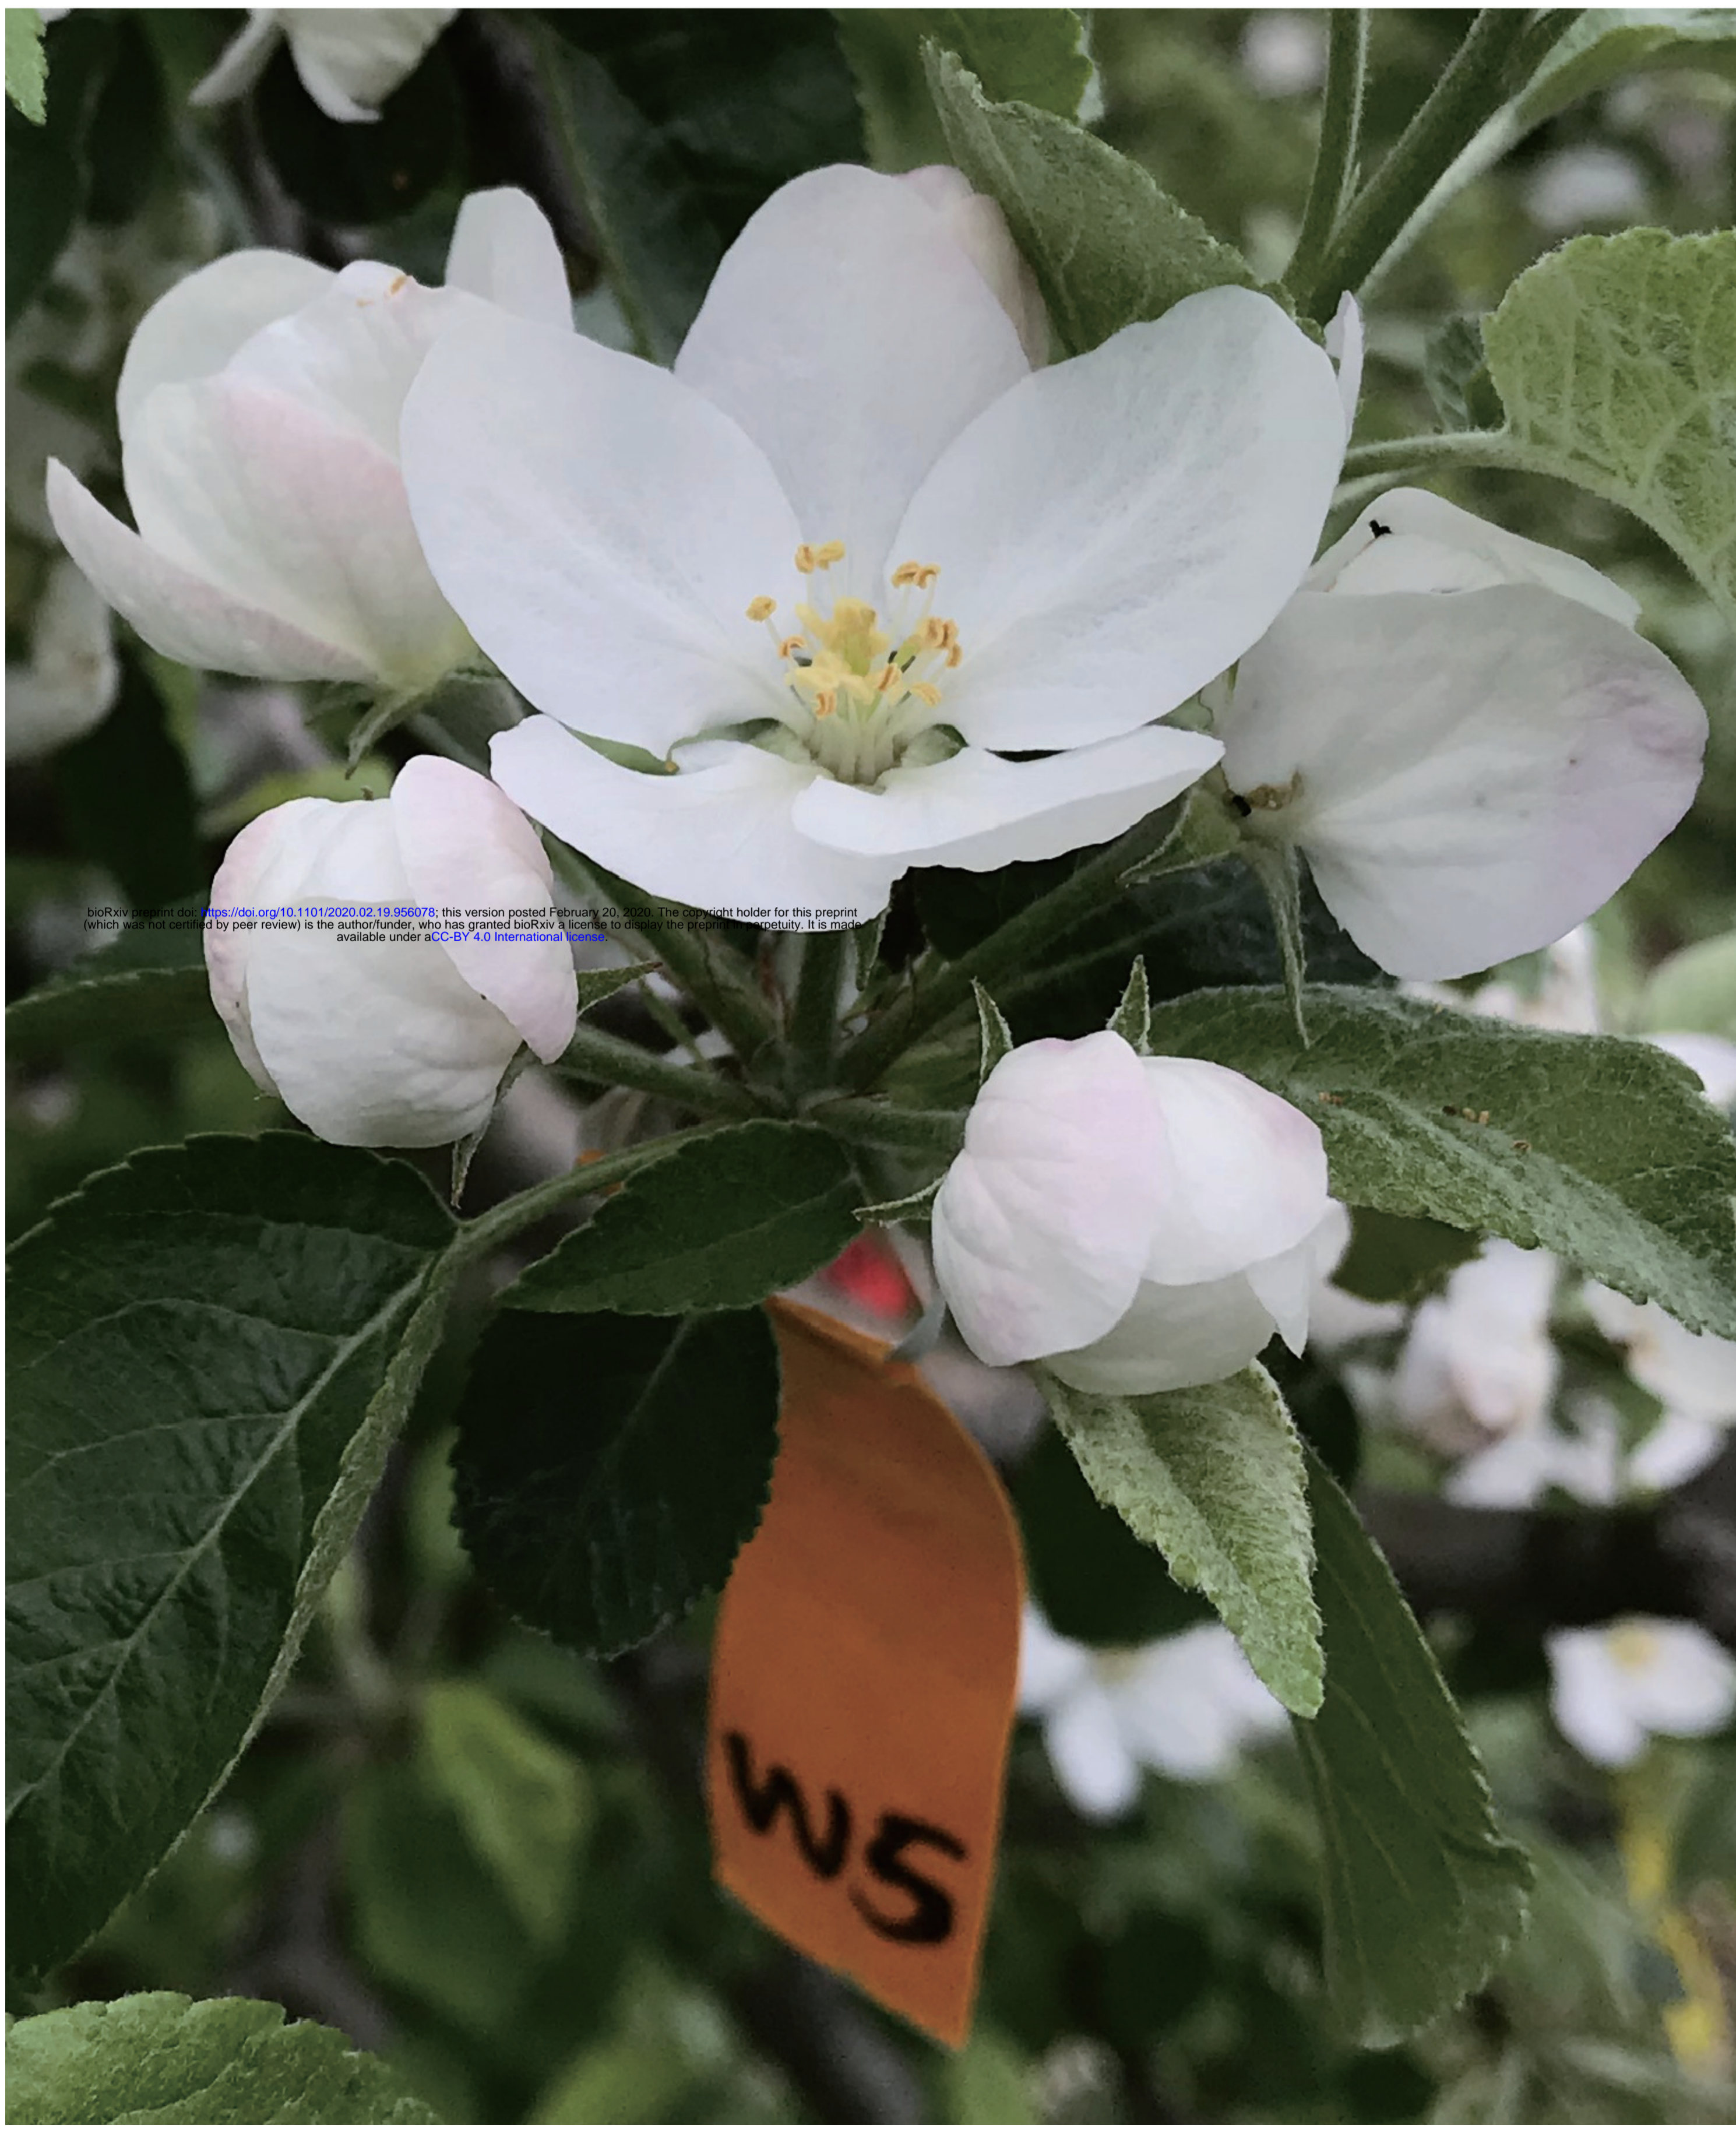**B**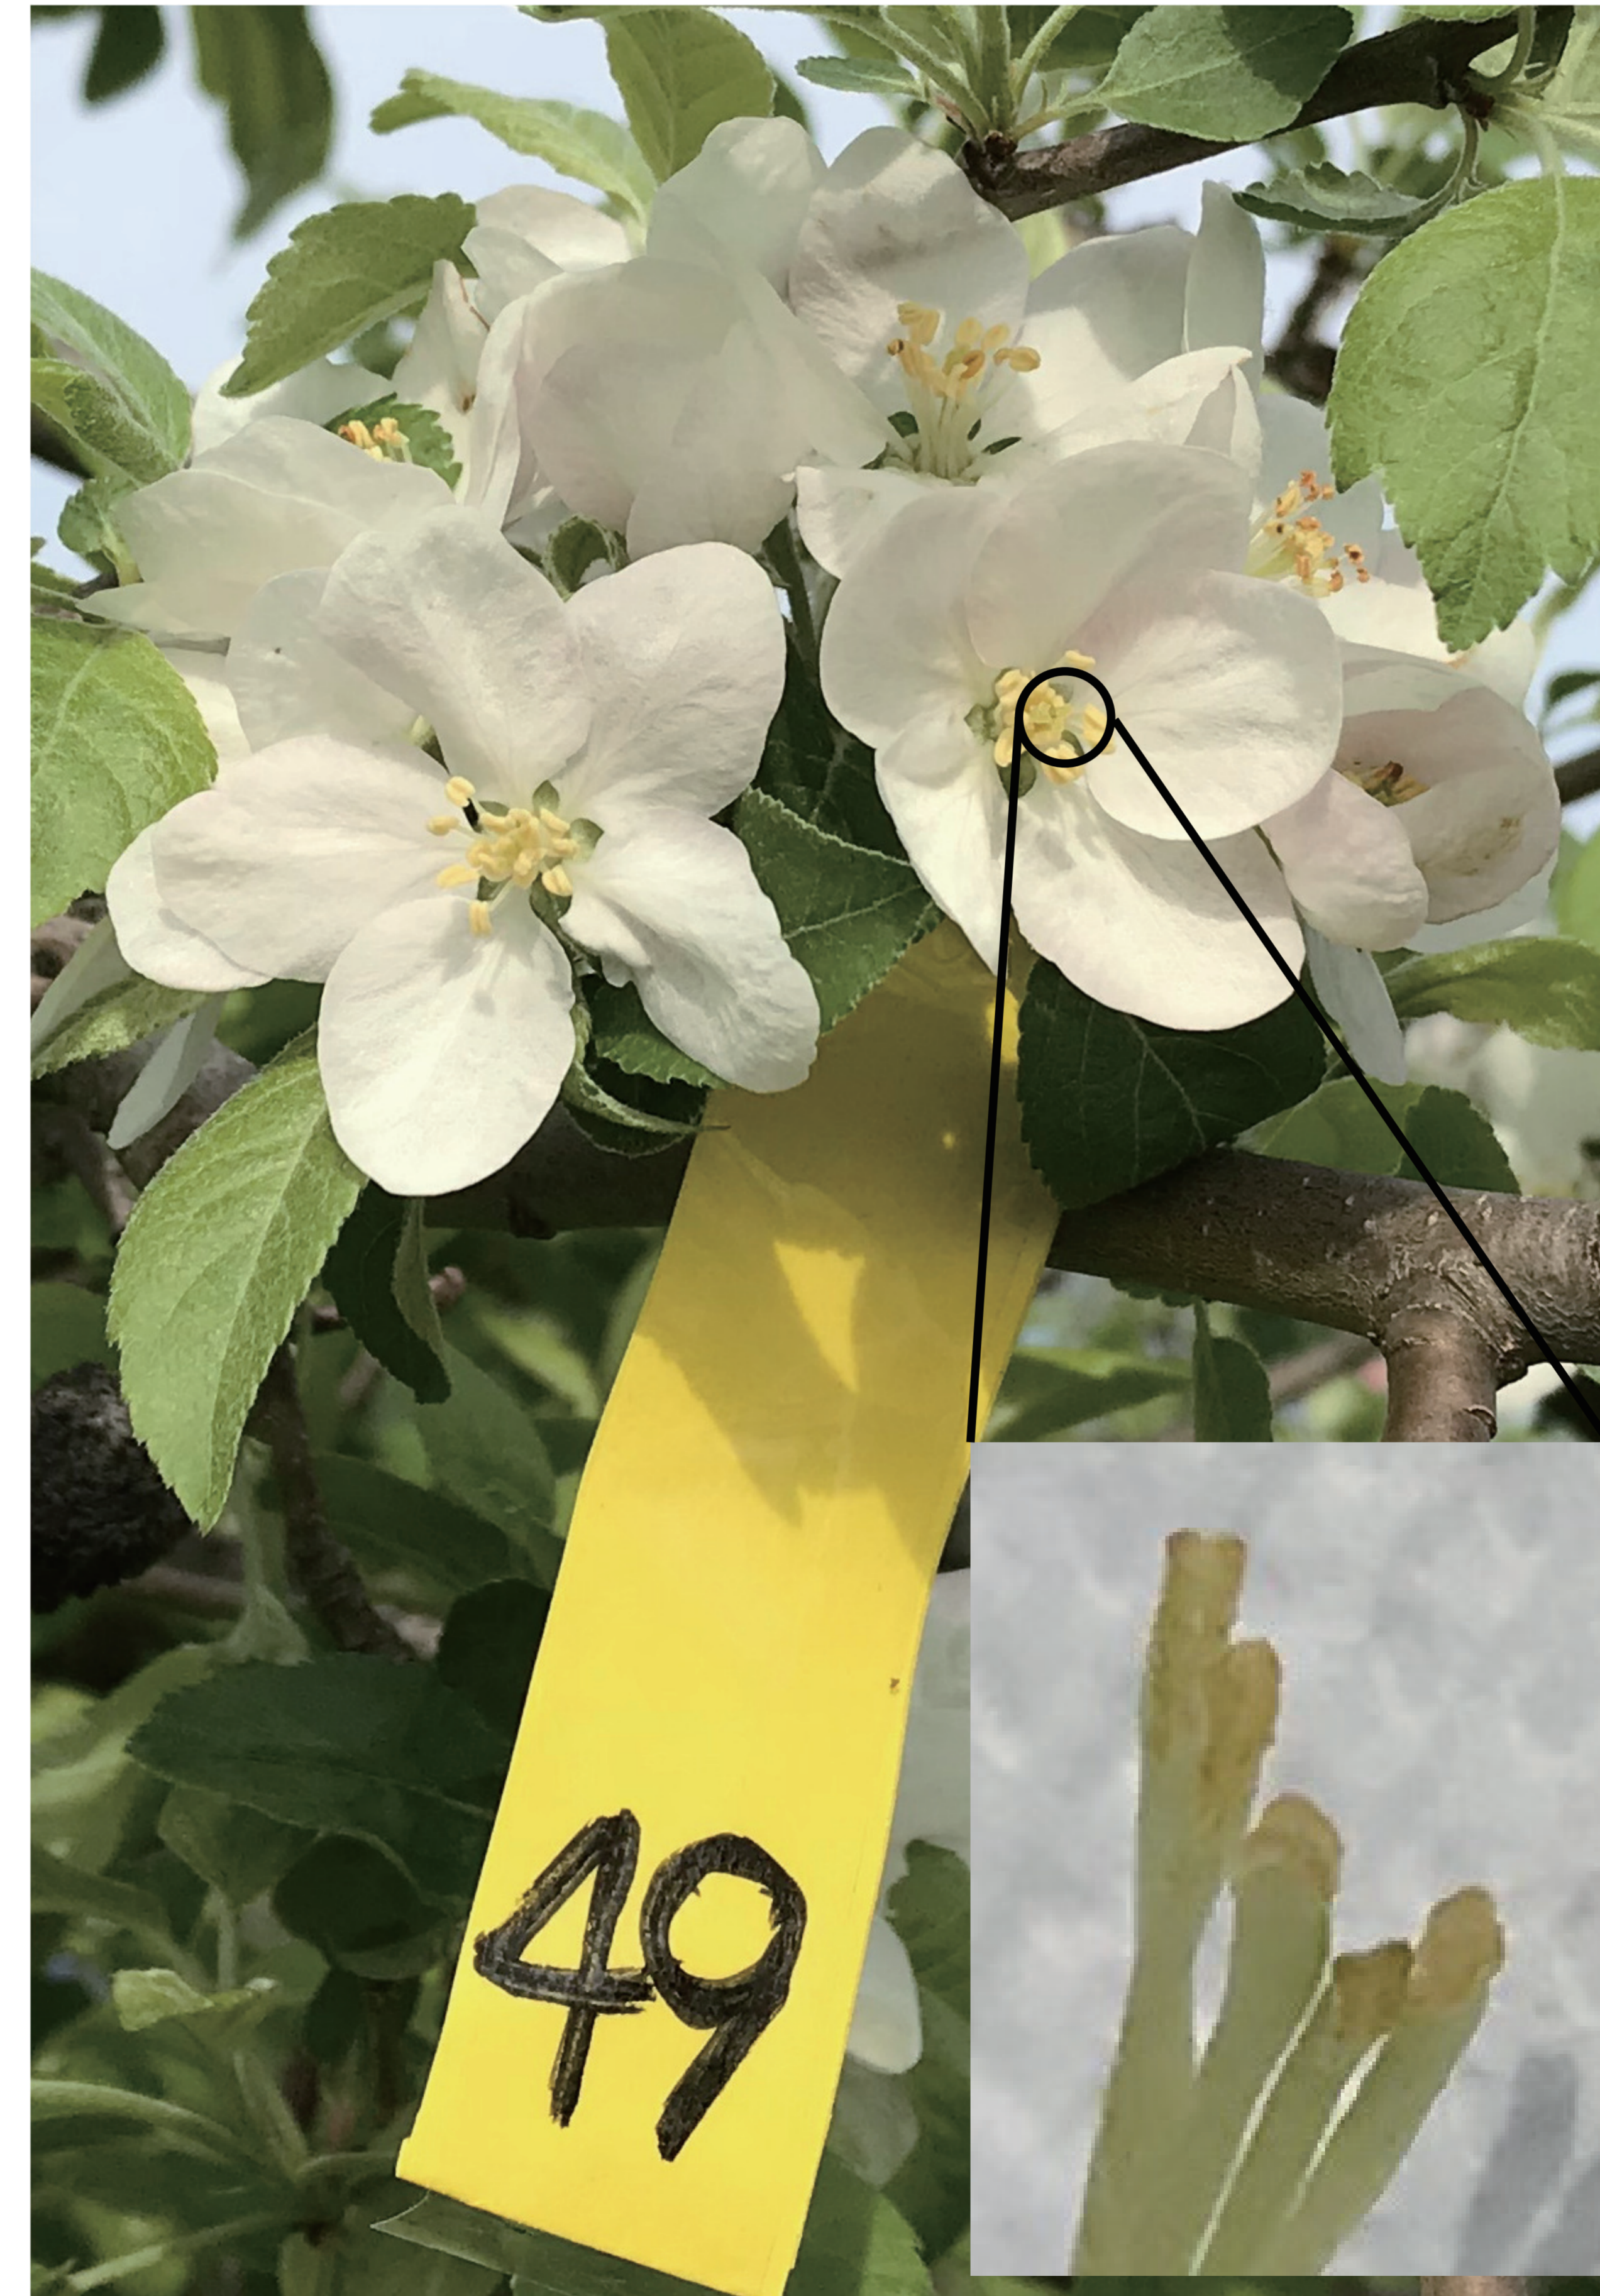**C**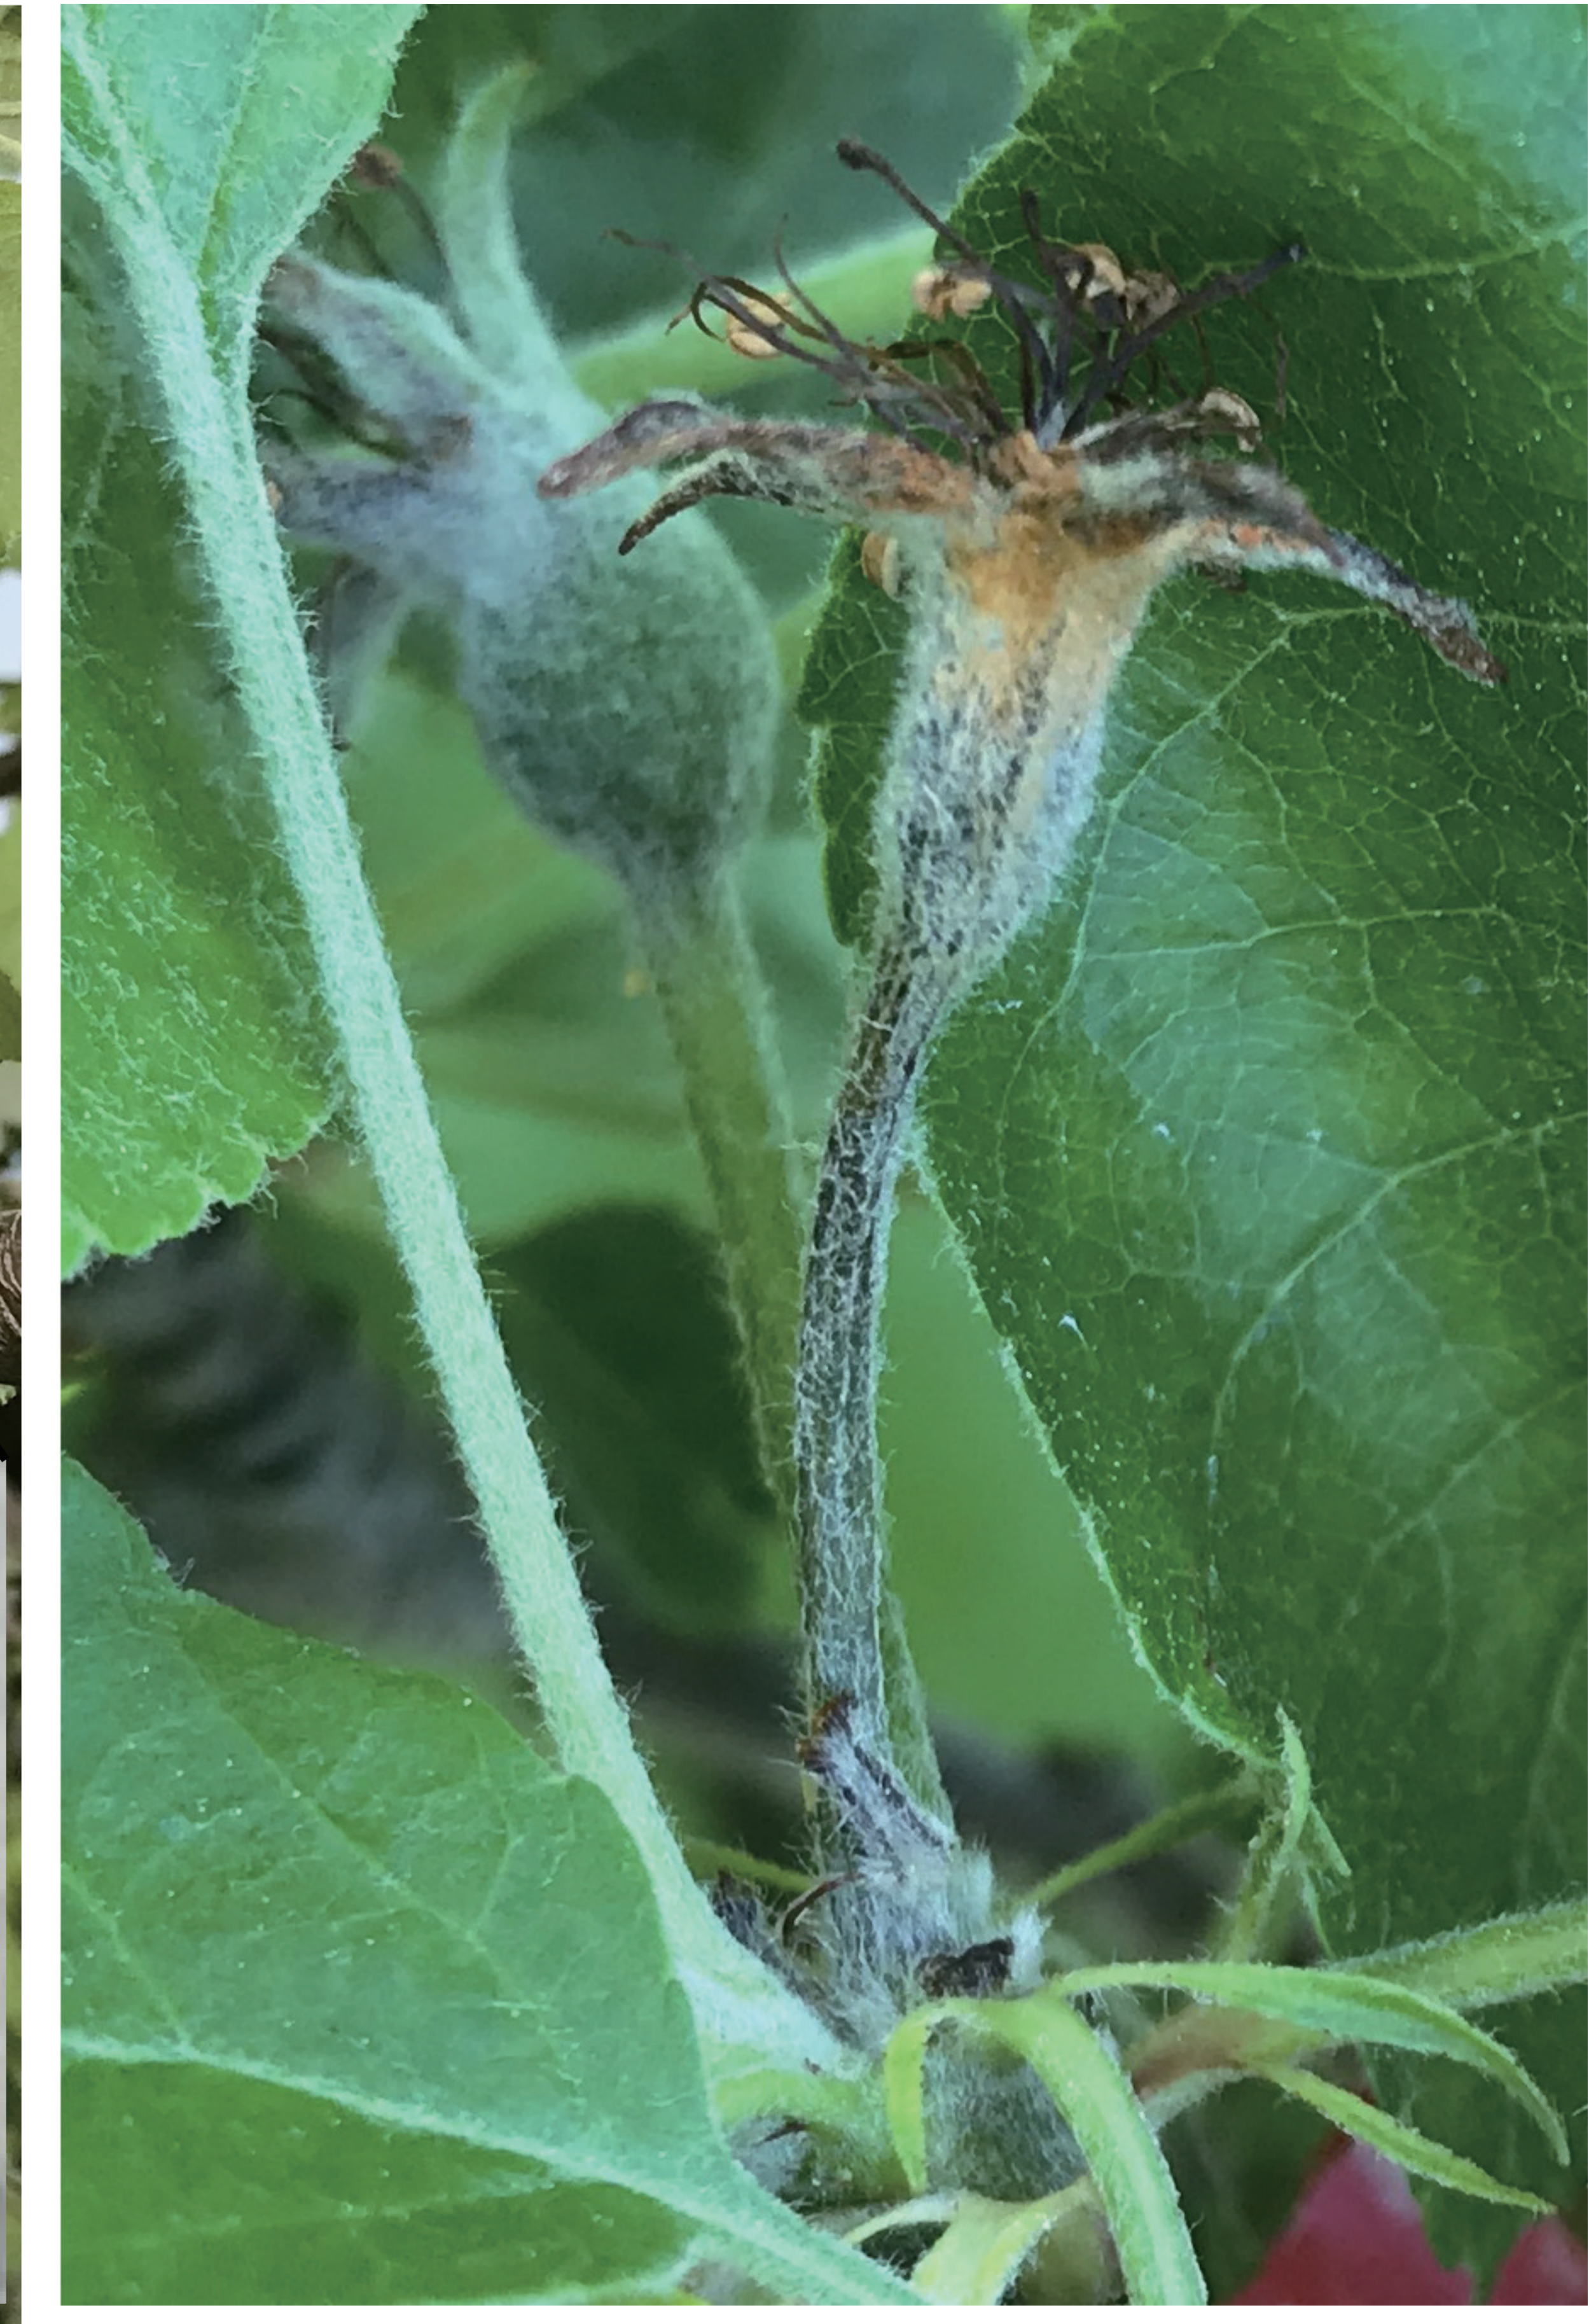

Day 3

Day 4

Day 5

Water control

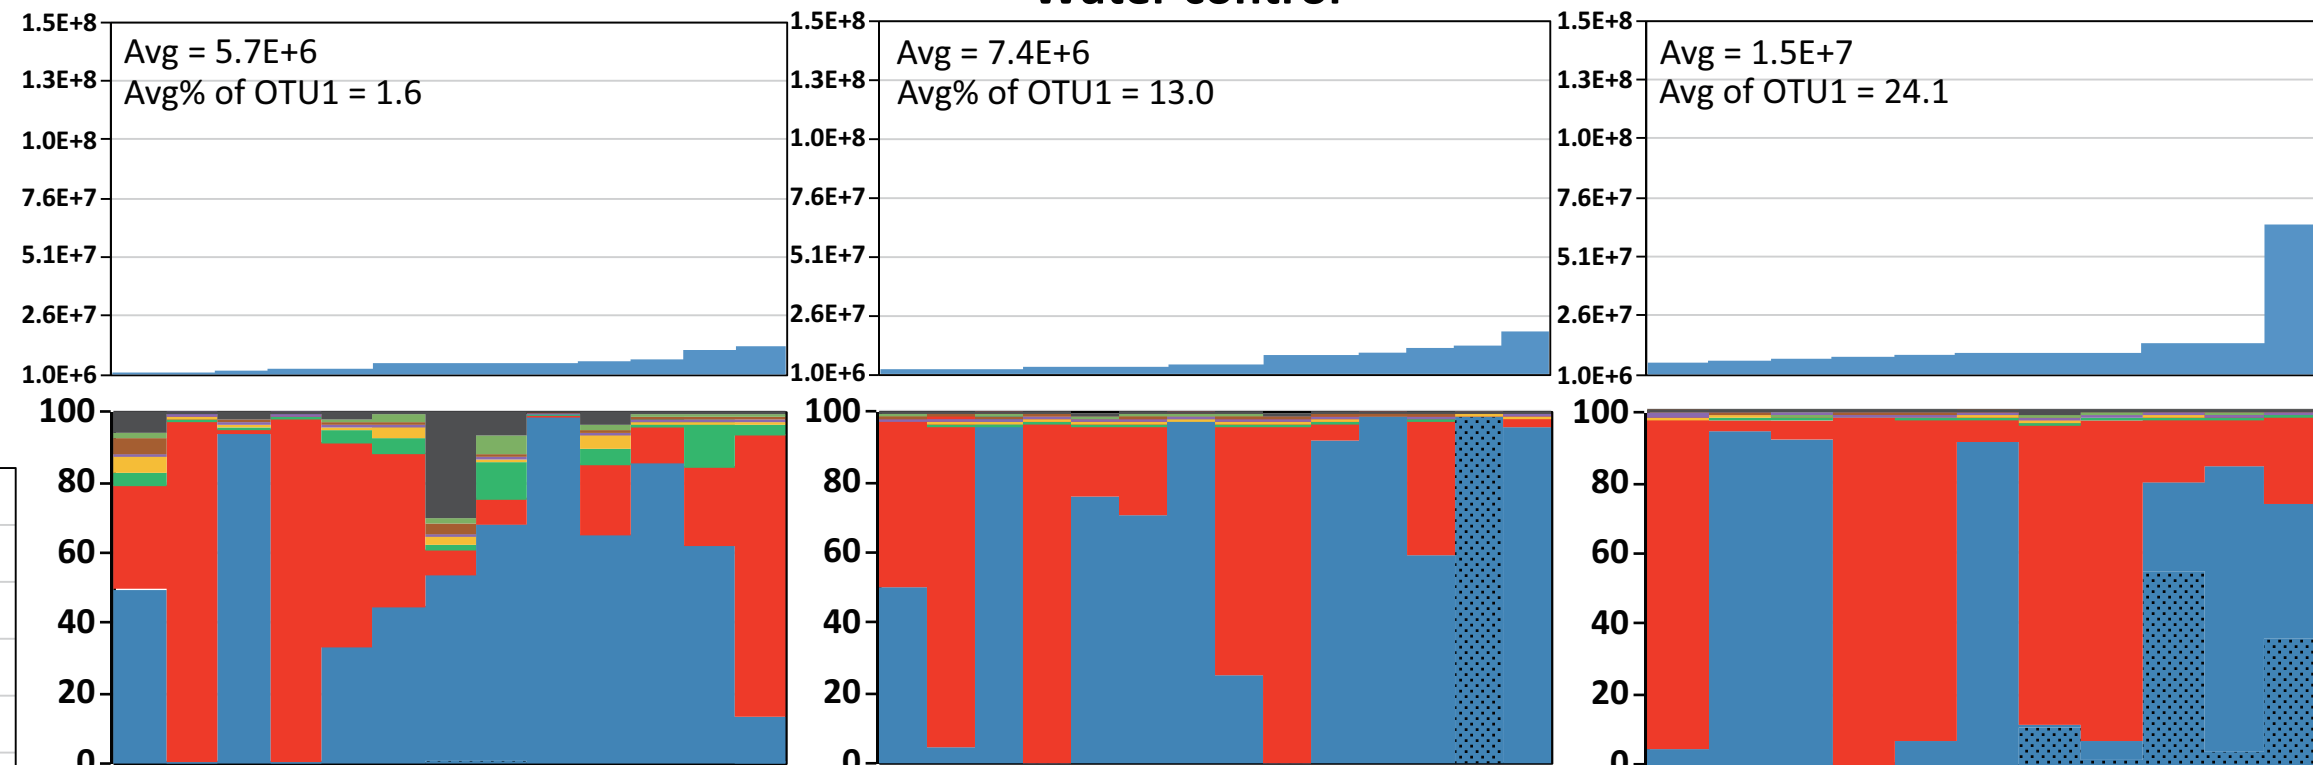

Day 1

Day 2

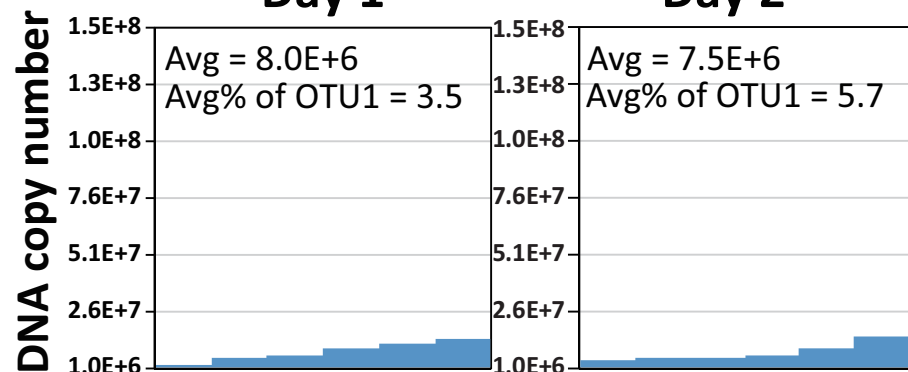

*Ea* inoculated

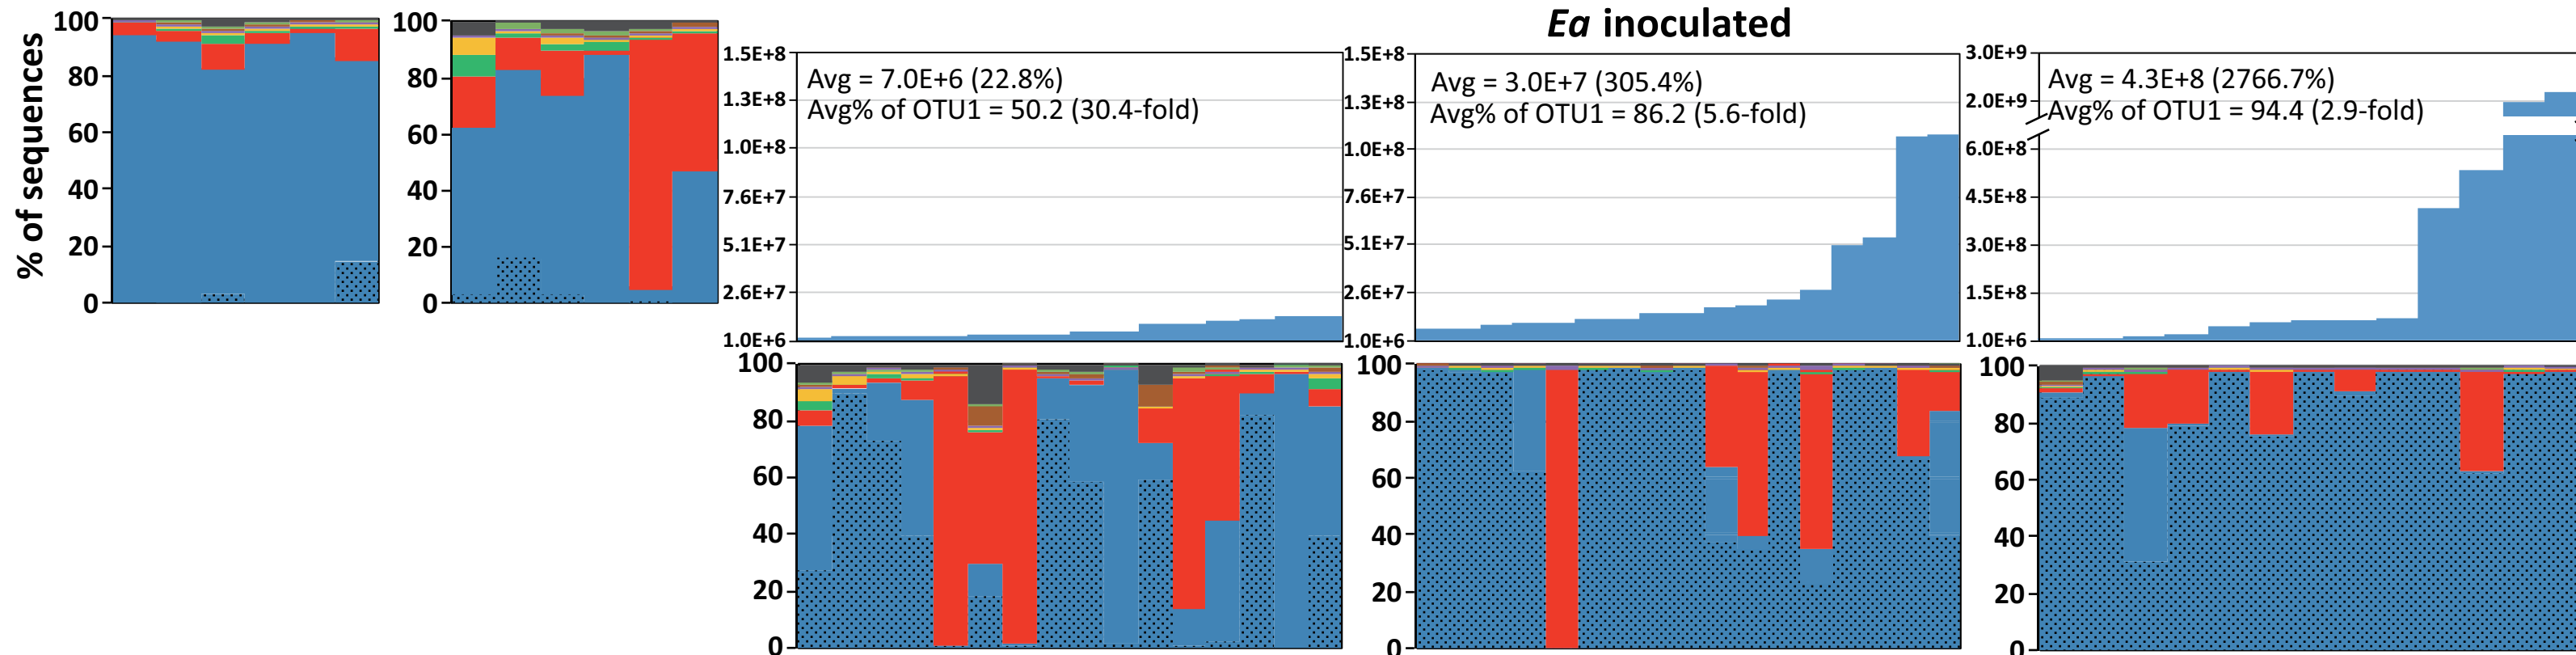

OTU1

Non-OTU1 *Enterobacteriaceae*

*Pseudomonadaceae*

*Moraxellaceae*

*Beijerinckiaceae*

*Gammaproteobacteria\_unclassified*

*Burkholderiaceae*

*Xanthomonadaceae*

rare

## A NMDS plot

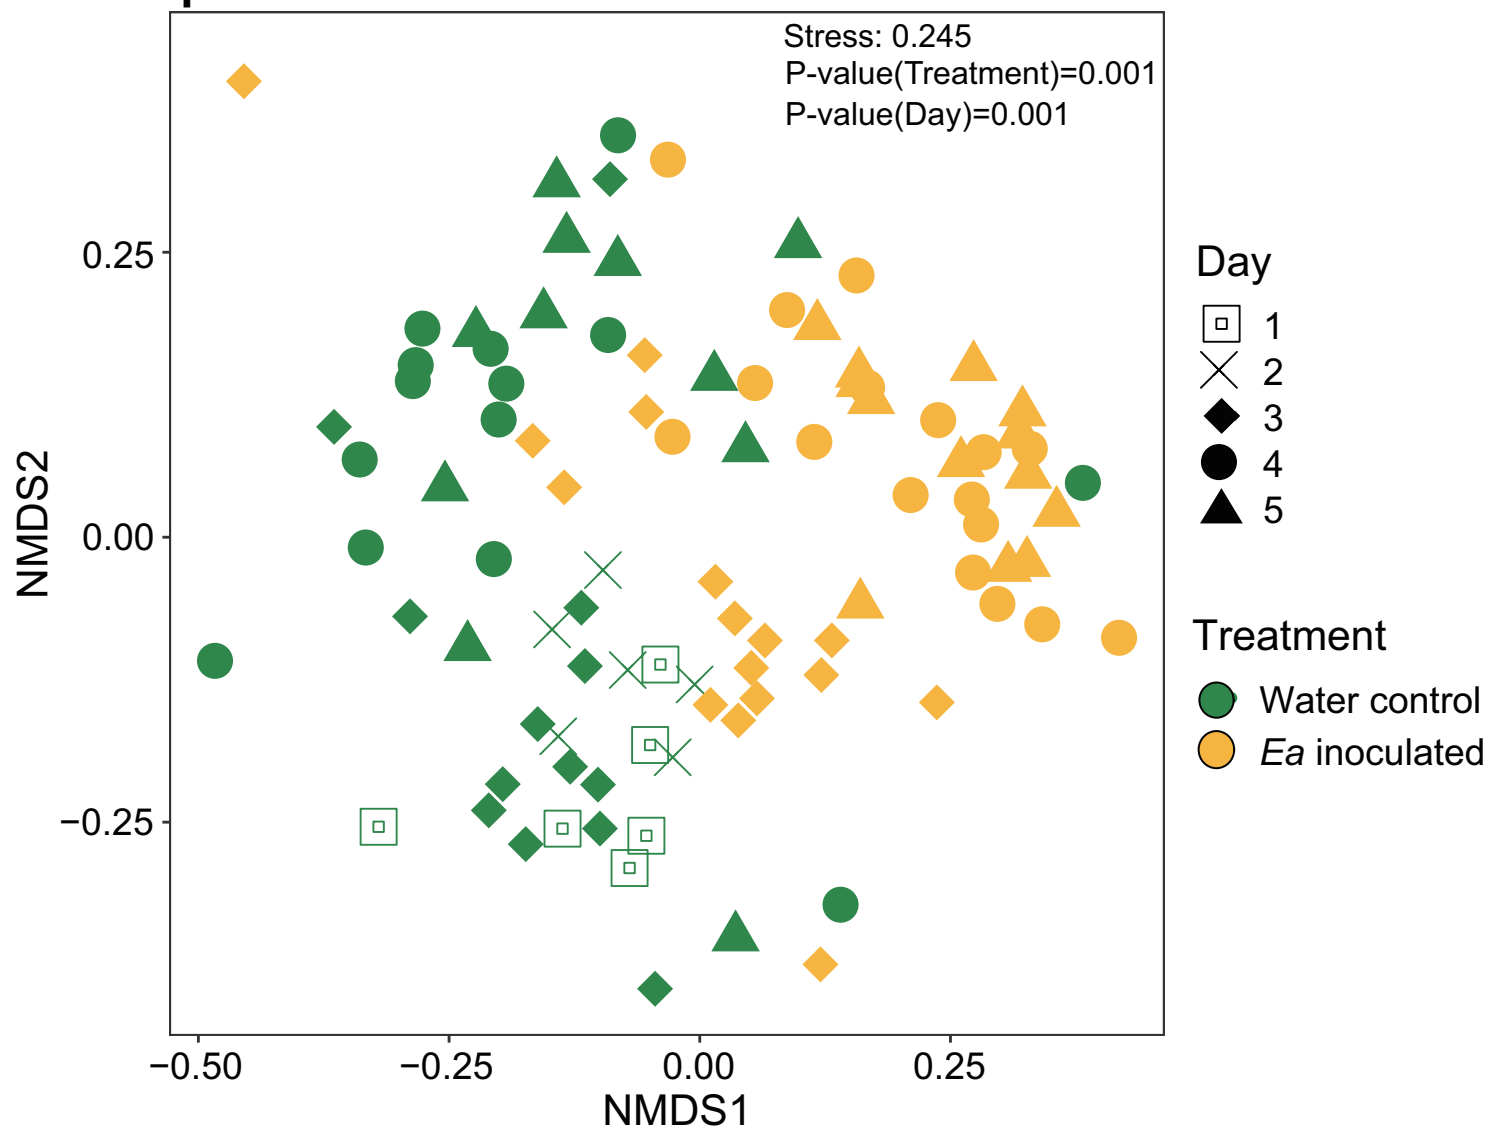

## B Comparative analysis of community diversity

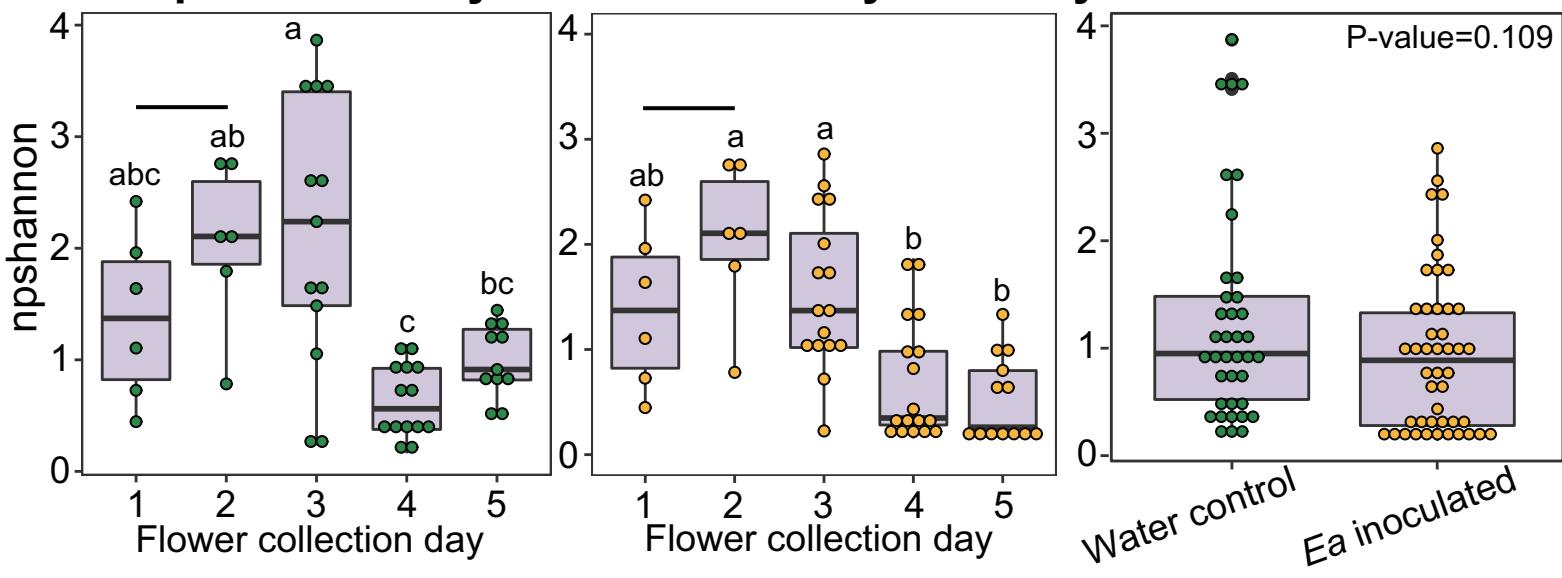

### A *E. amylovora* quantification

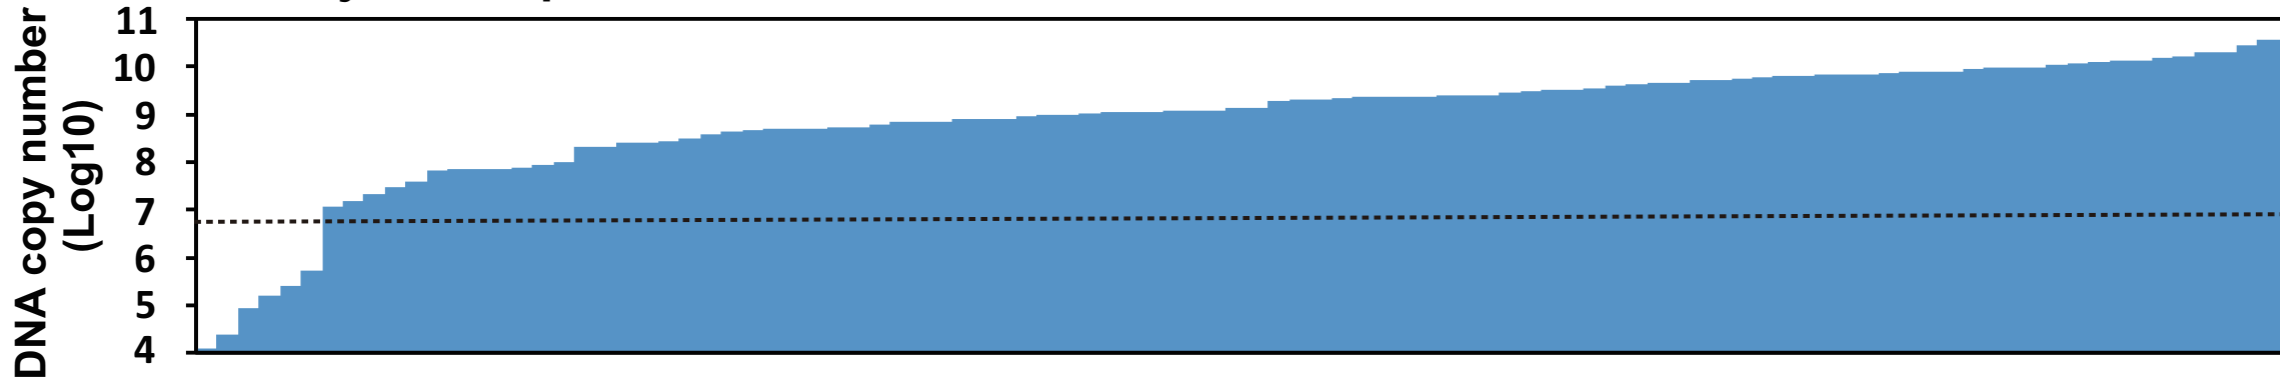

### B Family level taxonomic bins

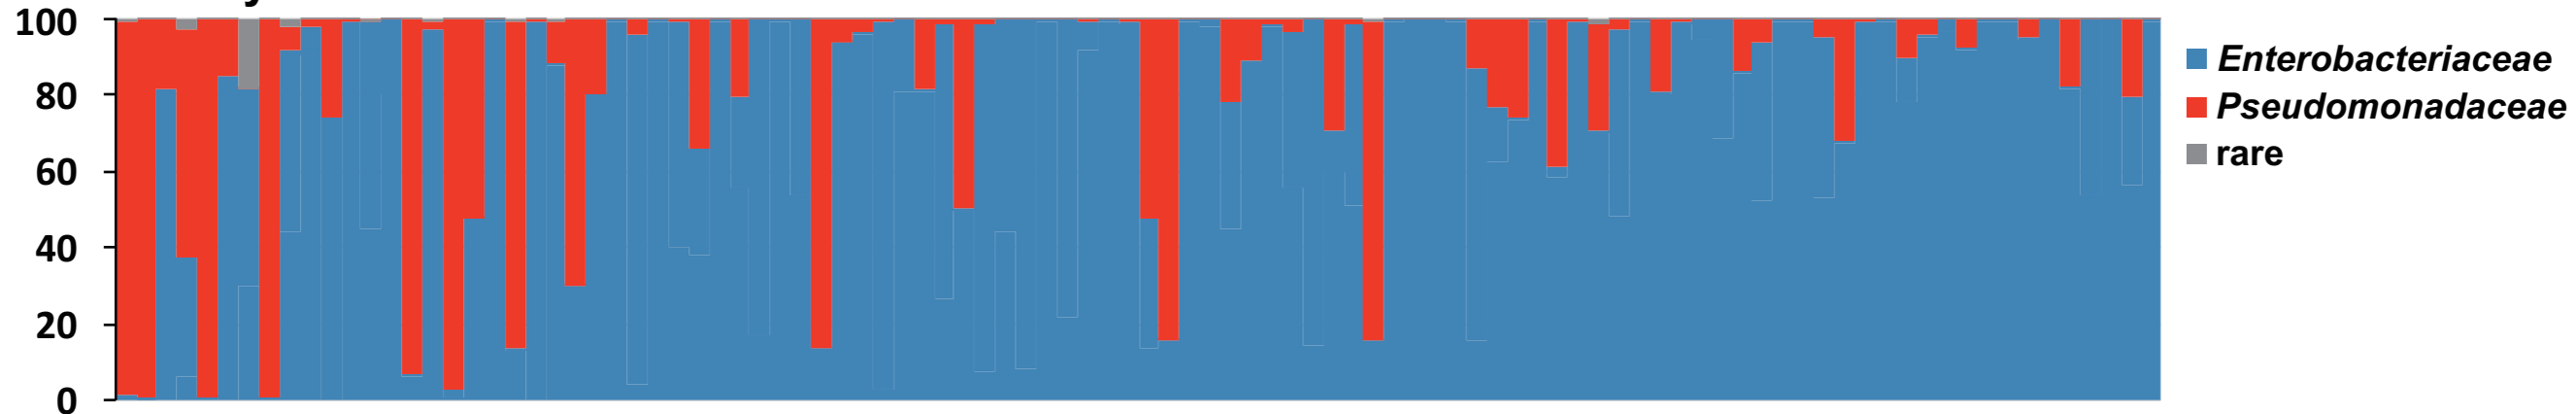

### C OTUs within *Pseudomonadaceae*

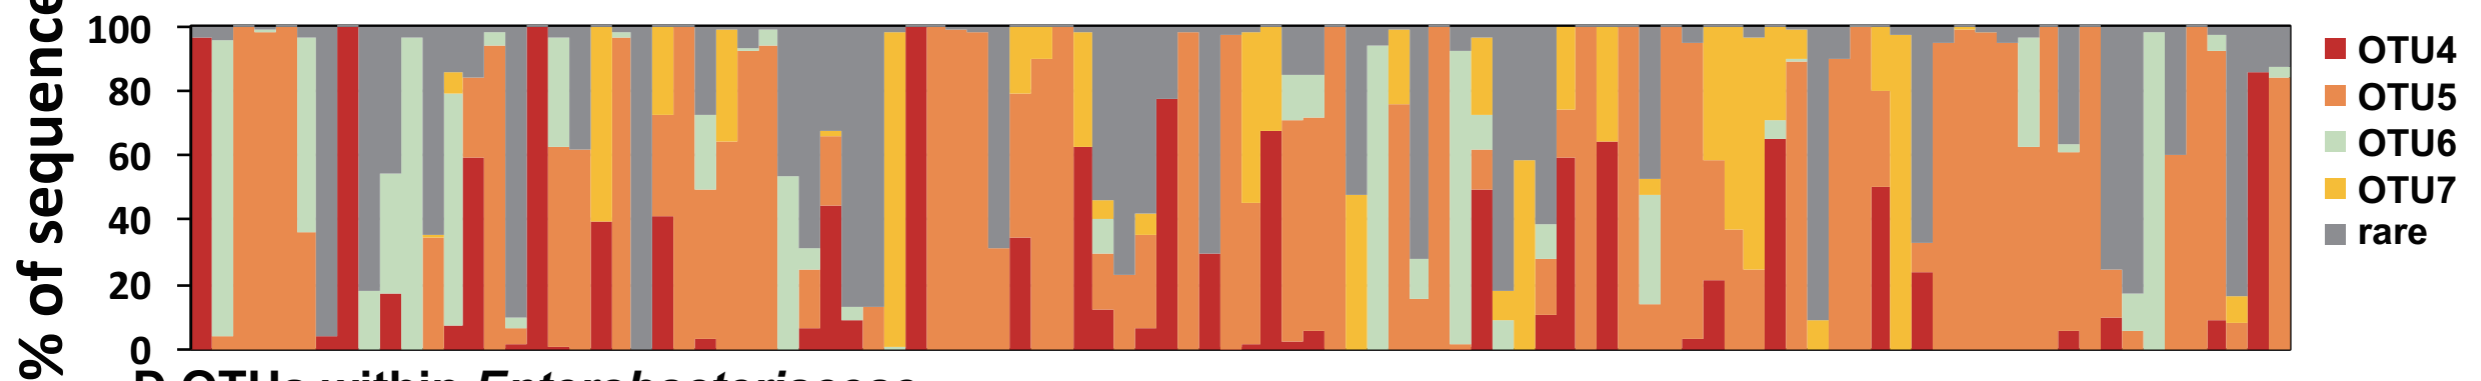

### D OTUs within *Enterobacteriaceae*

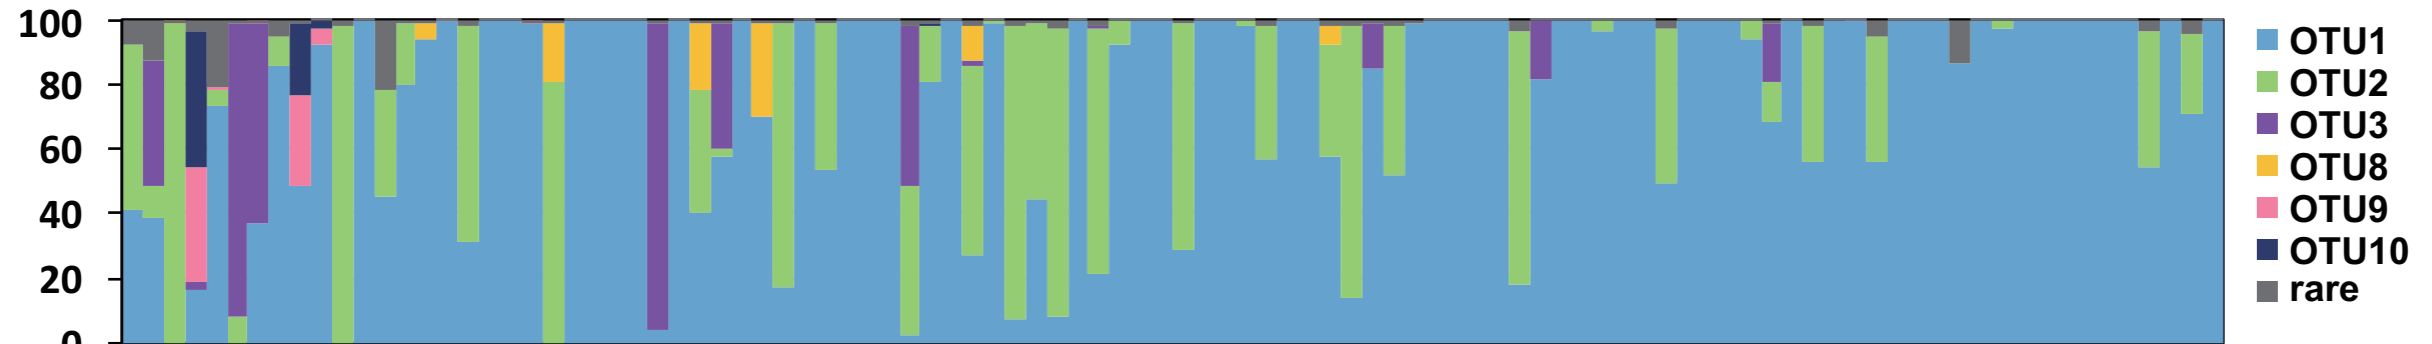

Low *Ea* copy number

High *Ea* copy number

**A**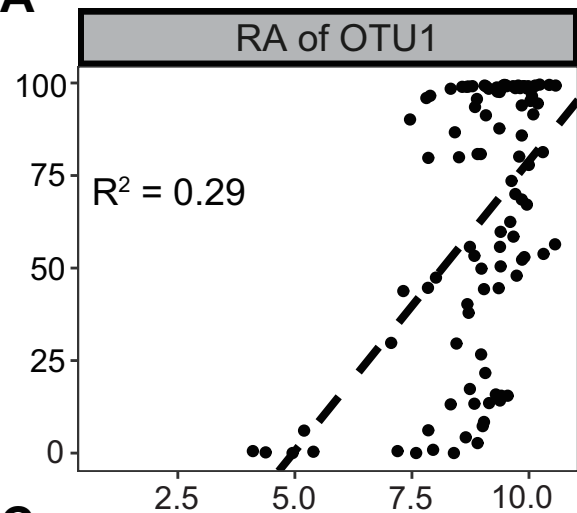**B**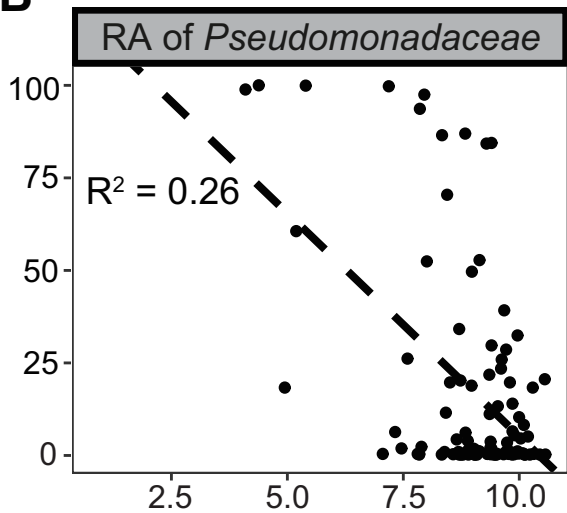**C**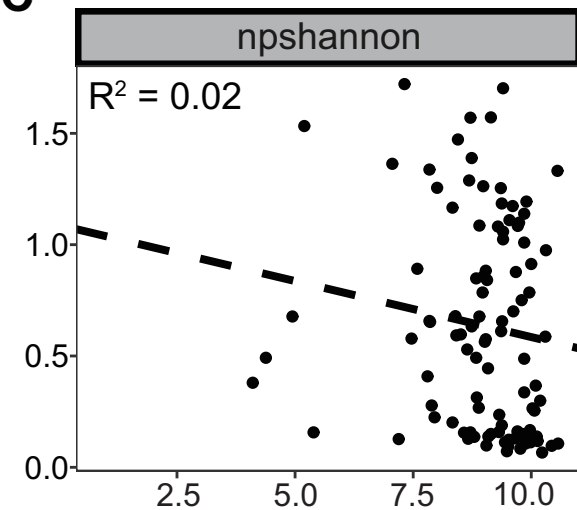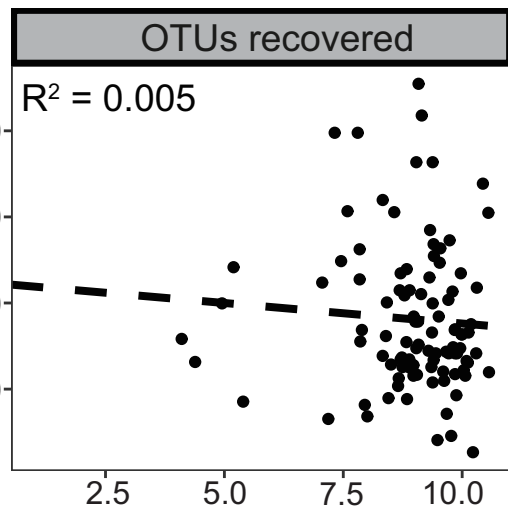

*E. amylovora* DNA copy number (Log10)
